# Supplementary material for: Aethiopinolones A–E, New Pregnenolone Type Steroids from the East African Basidiomycete Fomitiporia aethiopica
Source: PubMed Central journal article supplement (PMC6017562; doi:10.3390/molecules23020369), 2018-02-09

## Supporting information

# **Aethiopinolones A-E, new pregnenolone type steroids from the East African basidiomycete *Fomitiporia aethiopica***

Clara Chepkirui <sup>1,†</sup>, Winnie C. Sum <sup>2,†</sup>, Tian Cheng<sup>1</sup>, Josphat C. Matasyoh <sup>3</sup>, Cony Decock <sup>4</sup> and Marc Stadler <sup>1,\*</sup>

<sup>1</sup>Department of Microbial Drugs, Helmholtz Centre for Infection Research and German Centre for Infection Research (DZIF), partner site Hannover/Braunschweig, Inhoffenstrasse 7, 38124 Braunschweig, Germany;

<sup>2</sup>Egerton University, Department of Biochemistry, P.O BOX 536, 20115, Njoro, Kenya

<sup>3</sup> Egerton University, Department of Chemistry, P.O BOX 536, 20115, Njoro, Kenya

<sup>4</sup> Mycothèque de l' Université catholique de Louvain (BCCM/MUCL), Place Croix du Sud 3, B-1348 Louvain-la-Neuve, Belgium

\* Correspondence: marc.stadler@helmholtz-hzi.de; Tel.: +49 531 6181-4240; Fax: 49 531 6181-9499

† These authors contributed equally to this work.

## Contents

|                                                                                                         |     |
|---------------------------------------------------------------------------------------------------------|-----|
| LIST OF TABLES .....                                                                                    | iii |
| LIST OF FIGURES .....                                                                                   | iv  |
| 1 and 2D NMR data for Aethiopinolone A (1) .....                                                        | 1   |
| Figure 1: <sup>1</sup> H NMR spectrum of Aethiopinolone A (1) in acetone-d <sub>6</sub> (700 MHz) ..... | 1   |
| 1 and 2D NMR data for Aethiopinolone B (2).....                                                         | 7   |
| 1 and 2D NMR data for Aethiopinolone C (3) .....                                                        | 11  |
| 1 and 2D NMR data for Aethiopinolone D (4) .....                                                        | 17  |
| 1 and 2D NMR data for Aethiopinolone E (5).....                                                         | 23  |
| ITS sequences of the producing organism.....                                                            | 28  |
| Pictures of the herbarium and the culture of <i>Fomitiporia aethiopica</i> .....                        | 28  |

## LIST OF TABLES

Table 1: *S*-MTPA ester and *R*-MTPA ester chemical shifts analysis for Aethiopinolone A (1) 27

Table 2: *S*-MTPA ester and *R*-MTPA ester chemical shifts analysis for Aethiopinolone C (3) 27

Table 3: *S*-MTPA ester and *R*-MTPA ester chemical shifts analysis for Aethiopinolone D (4) 27

## LIST OF FIGURES

|                                                                                                                                                      |    |
|------------------------------------------------------------------------------------------------------------------------------------------------------|----|
| Figure 1: $^1\text{H}$ NMR spectrum of Aethiopinolone A (1) in acetone- $\text{d}_6$ (700 MHz) .....                                                 | 1  |
| Figure 2: $^{13}\text{C}$ NMR spectrum of Aethiopinolone A (1) in acetone- $\text{d}_6$ (175 MHz) .....                                              | 1  |
| Figure 3: DEPT spectrum of Aethiopinolone A (1) in acetone- $\text{d}_6$ (175 MHz) .....                                                             | 2  |
| Figure 4: $^1\text{H}$ , $^{13}\text{C}$ HSQC spectrum of Aethiopinolone A (1) in acetone- $\text{d}_6$ (700 MHz, 175MHz) .....                      | 2  |
| Figure 5: $^1\text{H}$ , $^{13}\text{C}$ HMBC spectrum of Aethiopinolone A (1) in acetone- $\text{d}_6$ (700 MHz, 175 MHz).<br>.....                 | 3  |
| Figure 6: $^1\text{H}$ , $^1\text{H}$ COSY spectrum of Aethiopinolone A (1) in acetone- $\text{d}_6$ (500 MHz): .....                                | 3  |
| Figure 7: $^1\text{H}$ , $^1\text{H}$ ROESY spectrum of Aethiopinolone A (1) in acetone- $\text{d}_6$ (500 MHz) .....                                | 4  |
| Figure 8: HRMS spectrum of Aethiopinolone A (1) .....                                                                                                | 4  |
| Figure 9: $^1\text{H}$ NMR spectrum of Aethiopinolone A (1) ( <i>S</i> )- MTPA ester in chloroform - $\text{d}$ (700 MHz) .....                      | 5  |
| Figure 10: $^1\text{H}$ , $^1\text{H}$ COSY NMR spectrum of Aethiopinolone A (1) ( <i>S</i> )- MTPA ester in chloroform - $\text{d}$ (700 MHz) ..... | 5  |
| Figure 11: $^1\text{H}$ NMR spectrum of Aethiopinolone A (1) ( <i>R</i> )- MTPA ester in chloroform - $\text{d}$ (700 MHz) .....                     | 6  |
| Figure 12: $^1\text{H}$ , $^1\text{H}$ COSY NMR spectrum of Aethiopinolone A (1) ( <i>R</i> )- MTPA ester in chloroform - $\text{d}$ (700 MHz) ..... | 6  |
| Figure 13: $^1\text{H}$ NMR spectrum of Aethiopinolone B (2) in DMSO- $\text{d}_6$ (500 MHz) .....                                                   | 7  |
| Figure 14: $^{13}\text{C}$ NMR spectrum of Aethiopinolone B (2) in in DMSO- $\text{d}_6$ (125 MHz) .....                                             | 7  |
| Figure 15: DEPT NMR spectrum of Aethiopinolone B (2) in in DMSO- $\text{d}_6$ (125 MHz) .....                                                        | 8  |
| Figure 16: $^1\text{H}$ , $^{13}\text{C}$ HSQC spectrum of Aethiopinolone B (2) in in DMSO- $\text{d}_6$ (500 MHz, 125 MHz) .....                    | 8  |
| Figure 17: $^1\text{H}$ , $^{13}\text{C}$ HMBC spectrum of Aethiopinolone B (2) in in DMSO- $\text{d}_6$ (500 MHz, 125 MHz) .....                    | 9  |
| Figure 18: $^1\text{H}$ , $^1\text{H}$ COSY spectrum of Aethiopinolone B (2) in in DMSO- $\text{d}_6$ (500 MHz) .....                                | 9  |
| Figure 19: $^1\text{H}$ , $^1\text{H}$ ROESY spectrum of Aethiopinolone B (2) in in DMSO- $\text{d}_6$ (500 MHz) .....                               | 10 |
| Figure 20: HRMS spectrum of Aethiopinolone B (2) .....                                                                                               | 10 |
| Figure 21: $^1\text{H}$ NMR spectrum of Aethiopinolone C (3) in acetone- $\text{d}_6$ (500 MHz) .....                                                | 11 |
| Figure 22: $^{13}\text{C}$ NMR spectrum of Aethiopinolone C (3) in acetone- $\text{d}_6$ (125 MHz) .....                                             | 11 |
| Figure 23: DEPT NMR spectrum of Aethiopinolone C (3) in acetone- $\text{d}_6$ (125 MHz) .....                                                        | 12 |
| Figure 24: $^1\text{H}$ , $^{13}\text{C}$ HSQC spectrum of Aethiopinolone C (3) in acetone- $\text{d}_6$ (500MHz, 125 MHz) .....                     | 12 |
| Figure 25: $^1\text{H}$ , $^{13}\text{C}$ HMBC spectrum of Aethiopinolone C (3) in acetone- $\text{d}_6$ (500MHz, 125 MHz) .....                     | 13 |
| Figure 26: $^1\text{H}$ , $^1\text{H}$ COSY spectrum of Aethiopinolone C (3) in acetone- $\text{d}_6$ (500MHz) .....                                 | 13 |
| Figure 27: $^1\text{H}$ , $^1\text{H}$ ROESY spectrum of Aethiopinolone C (3) in acetone- $\text{d}_6$ (500MHz) .....                                | 14 |
| Figure 28: HRMS data for Aethiopinolone C (3) .....                                                                                                  | 14 |
| Figure 29: $^1\text{H}$ NMR spectrum of Aethiopinolone C (3) ( <i>S</i> )- MTPA ester in pyridine - $\text{d}_5$ (700 MHz) .....                     | 15 |

|                                                                                                                                             |    |
|---------------------------------------------------------------------------------------------------------------------------------------------|----|
| Figure 30: <sup>1</sup> H, <sup>1</sup> H COSY spectrum of Aethiopinolone C (3) (S)- MTPA ester in pyridine -d <sub>5</sub> (700 MHz) ..... | 15 |
| Figure 31: <sup>1</sup> H NMR spectrum of Aethiopinolone C (3) (R)- MTPA ester in pyridine -d <sub>5</sub> (700 MHz) .....                  | 16 |
| Figure 32: <sup>1</sup> H, <sup>1</sup> H COSY spectrum of Aethiopinolone C (3) (R)- MTPA ester in pyridine -d <sub>5</sub> (700 MHz) ..... | 16 |
| Figure 33: <sup>1</sup> H NMR spectrum for Aethiopinolone D (4) in acetone-d <sub>6</sub> (175 MHz).....                                    | 17 |
| Figure 34: <sup>13</sup> C NMR spectrum of Aethiopinolone D (4) in acetone-d <sub>6</sub> (175 MHz).....                                    | 17 |
| Figure 35: DEPT NMR spectrum of Aethiopinolone D (4) in acetone-d <sub>6</sub> (175 MHz) Figure                                             |    |
| 36: <sup>1</sup> H, <sup>13</sup> C HSQC spectrum of Aethiopinolone D (4) in acetone-d <sub>6</sub> (700 MHz, 175 MHz).....                 | 18 |
| Figure 37: <sup>1</sup> H, <sup>13</sup> C HMBC spectrum of Aethiopinolone D (4) in acetone-d <sub>6</sub> (700 MHz, 175 MHz) .....         | 19 |
| Figure 38: <sup>1</sup> H, <sup>1</sup> H COSY spectrum of Aethiopinolone D (4) in acetone-d <sub>6</sub> (700 MHz).....                    | 19 |
| Figure 39: <sup>1</sup> H, <sup>1</sup> H ROESY spectrum of Aethiopinolone D (4) in acetone-d <sub>6</sub> (700 MHz).....                   | 20 |
| Figure 40: HRMS spectrum for Aethiopinolone D (4).....                                                                                      | 20 |
| Figure 41: <sup>1</sup> H NMR spectrum of Aethiopinolone D (4) (S)- MTPA ester in pyridine -d <sub>5</sub> (700 MHz) .....                  | 21 |
| Figure 42: <sup>1</sup> H, <sup>1</sup> H COSY spectrum of Aethiopinolone D (4) (S)- MTPA ester in pyridine -d <sub>5</sub> (700 MHz) ..... | 21 |
| Figure 43: <sup>1</sup> H NMR spectrum of Aethiopinolone D (4) (R)- MTPA ester in pyridine -d <sub>5</sub> (700 MHz) .....                  | 22 |
| Figure 44: <sup>1</sup> H, <sup>1</sup> H COSY spectrum of Aethiopinolone D (4) (R)- MTPA ester in pyridine -d <sub>5</sub> (700 MHz) ..... | 22 |
| Figure 45: <sup>1</sup> H NMR spectrum of Aethiopinolone E (5) in acetone-d <sub>6</sub> (700 MHz) .....                                    | 23 |
| Figure 46: <sup>13</sup> C NMR spectrum of Aethiopinolone E (5) in acetone-d <sub>6</sub> (175 MHz) .....                                   | 23 |
| Figure 47: DEPT NMR spectrum of Aethiopinolone E (5) in acetone-d <sub>6</sub> (175 MHz) .....                                              | 24 |
| Figure 48: <sup>1</sup> H, <sup>13</sup> C HSQC NMR spectrum of Aethiopinolone E (5) in acetone-d <sub>6</sub> (700 MHz, 175 MHz) .....     | 24 |
| Figure 49: <sup>1</sup> H, <sup>13</sup> C HMBC NMR spectrum of Aethiopinolone E (5) in acetone-d <sub>6</sub> (700 MHz, 175 MHz) .....     | 25 |
| Figure 50: <sup>1</sup> H, <sup>1</sup> H COSY NMR spectrum of Aethiopinolone E (5) in acetone-d <sub>6</sub> (700 MHz).....                | 25 |
| Figure 51: <sup>1</sup> H, <sup>1</sup> H ROESY NMR spectrum of Aethiopinolone E (5) in acetone-d <sub>6</sub> (700 MHz) ..                 | 26 |
| Figure 52: HRMS spectrum for Aethiopinolone E (5) .....                                                                                     | 26 |

# 1 and 2D NMR data for Aethiopinolone A (1)

Figure 1: <sup>1</sup>H NMR spectrum of Aethiopinolone A (1) in acetone-d<sub>6</sub> (700 MHz)

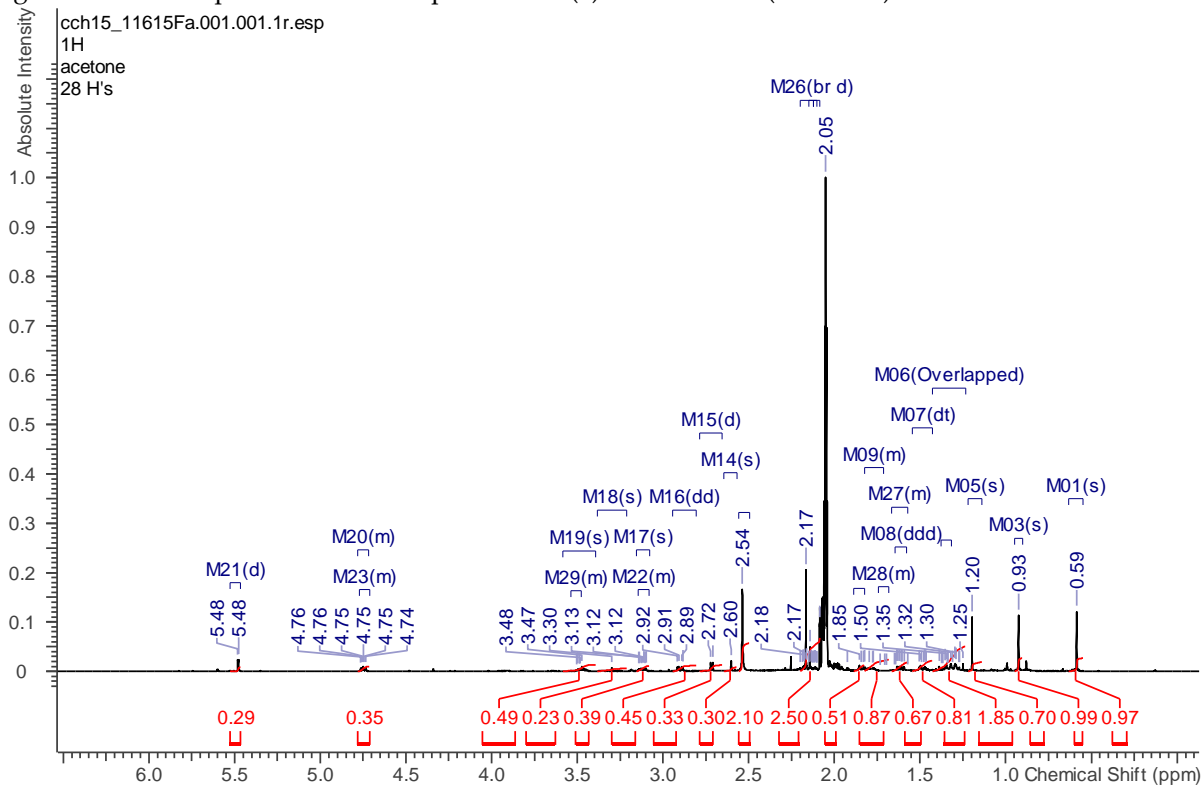

Figure 2: <sup>13</sup>C NMR spectrum of Aethiopinolone A (1) in acetone-d<sub>6</sub> (175 MHz)

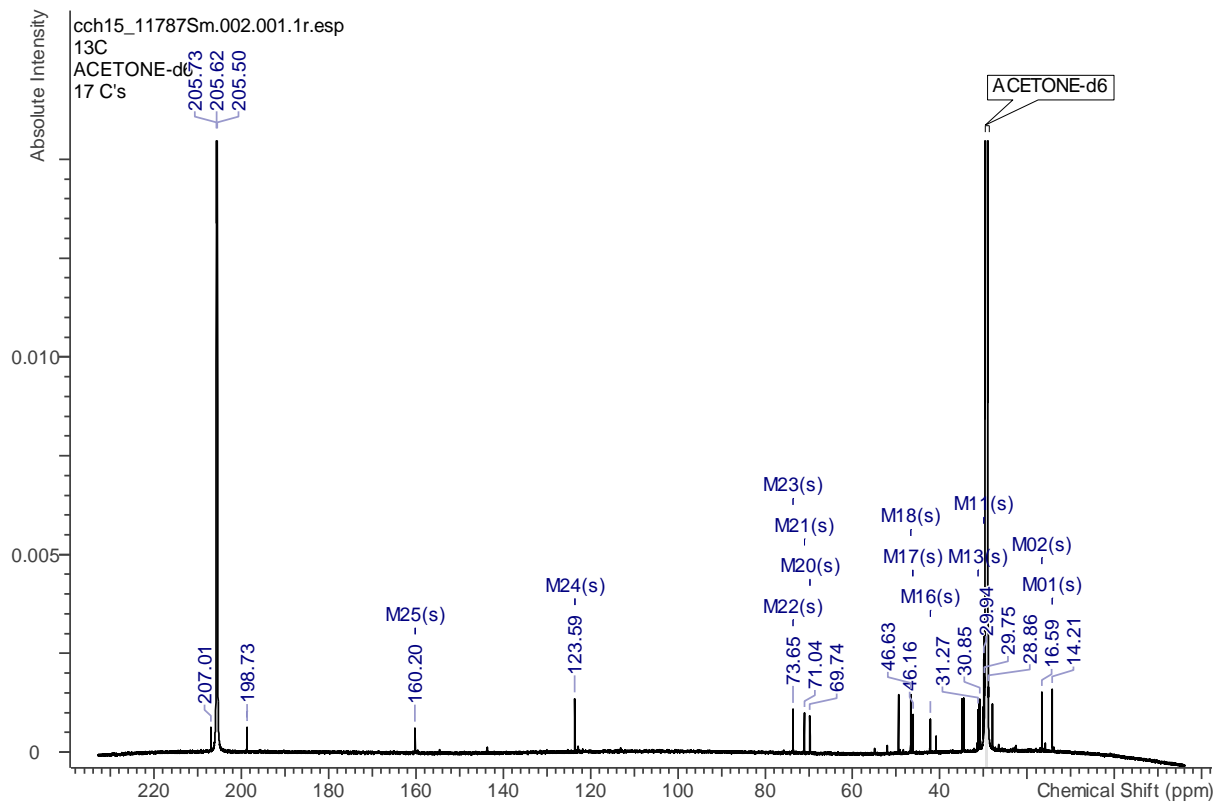

Figure 3: DEPT spectrum of Aethiopinolone A (1) in acetone-d<sub>6</sub> (175 MHz)

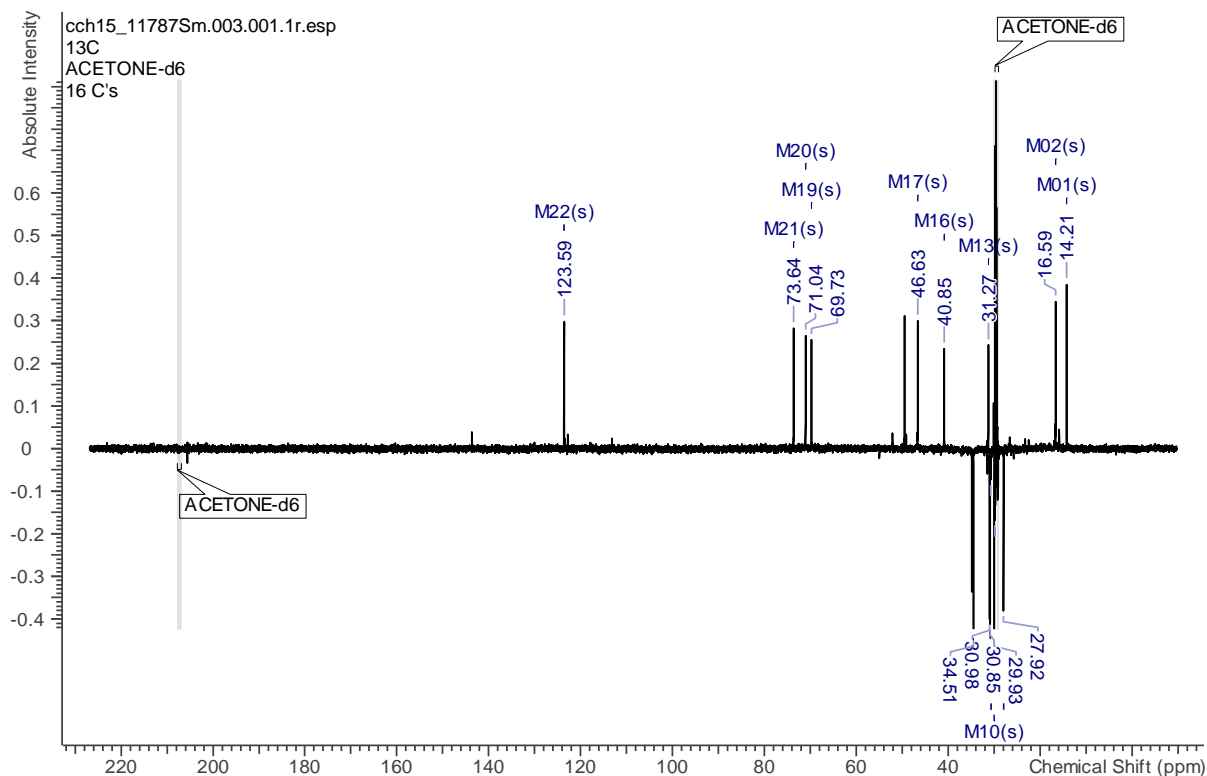

Figure 4: <sup>1</sup>H, <sup>13</sup>C HSQC spectrum of Aethiopinolone A (1) in acetone-d<sub>6</sub> (700 MHz, 175 MHz)

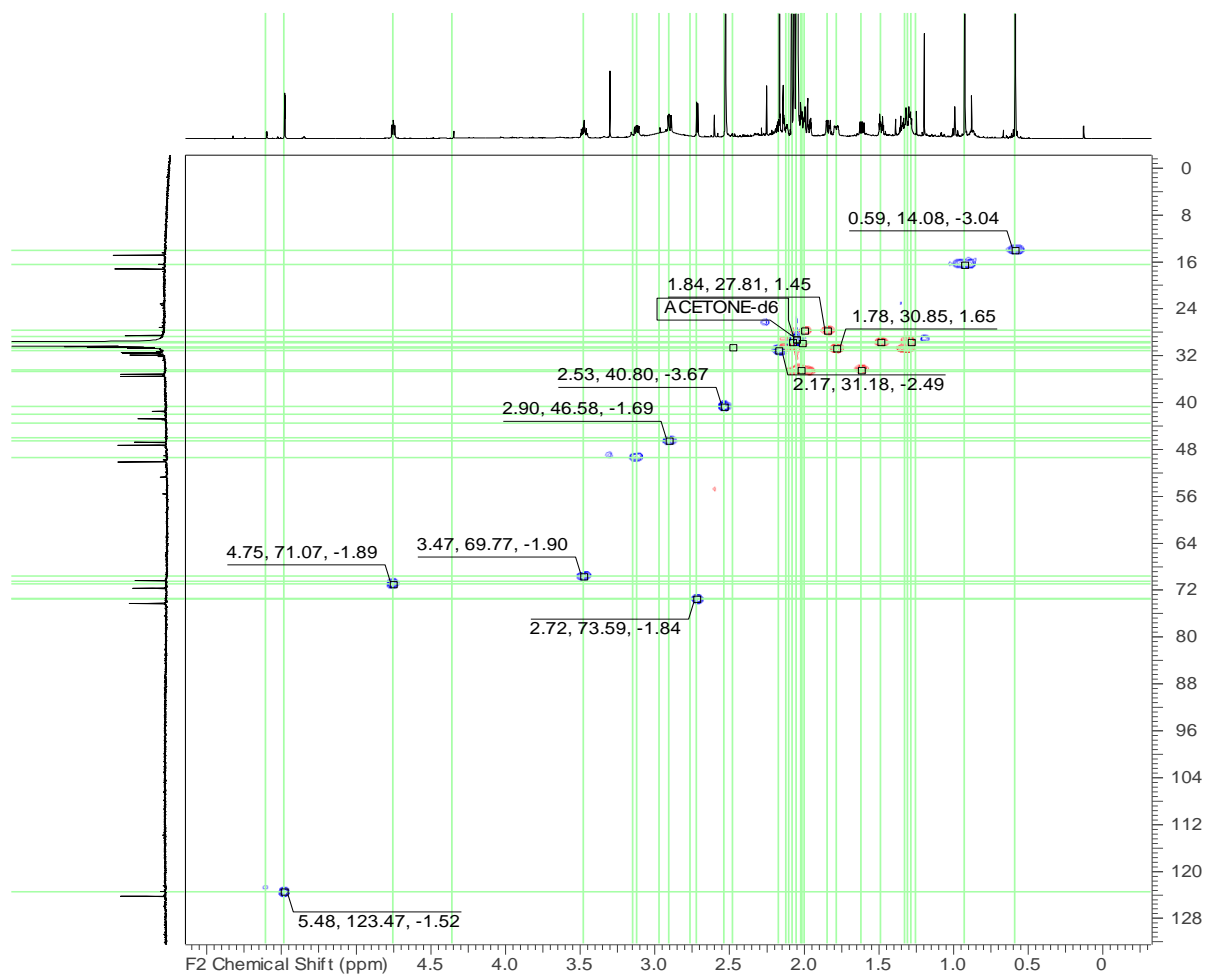

Figure 5:  $^1\text{H}$ ,  $^{13}\text{C}$  HMBC spectrum of Aethiopinolone A (**1**) in acetone- $d_6$  (700 MHz, 175 MHz).

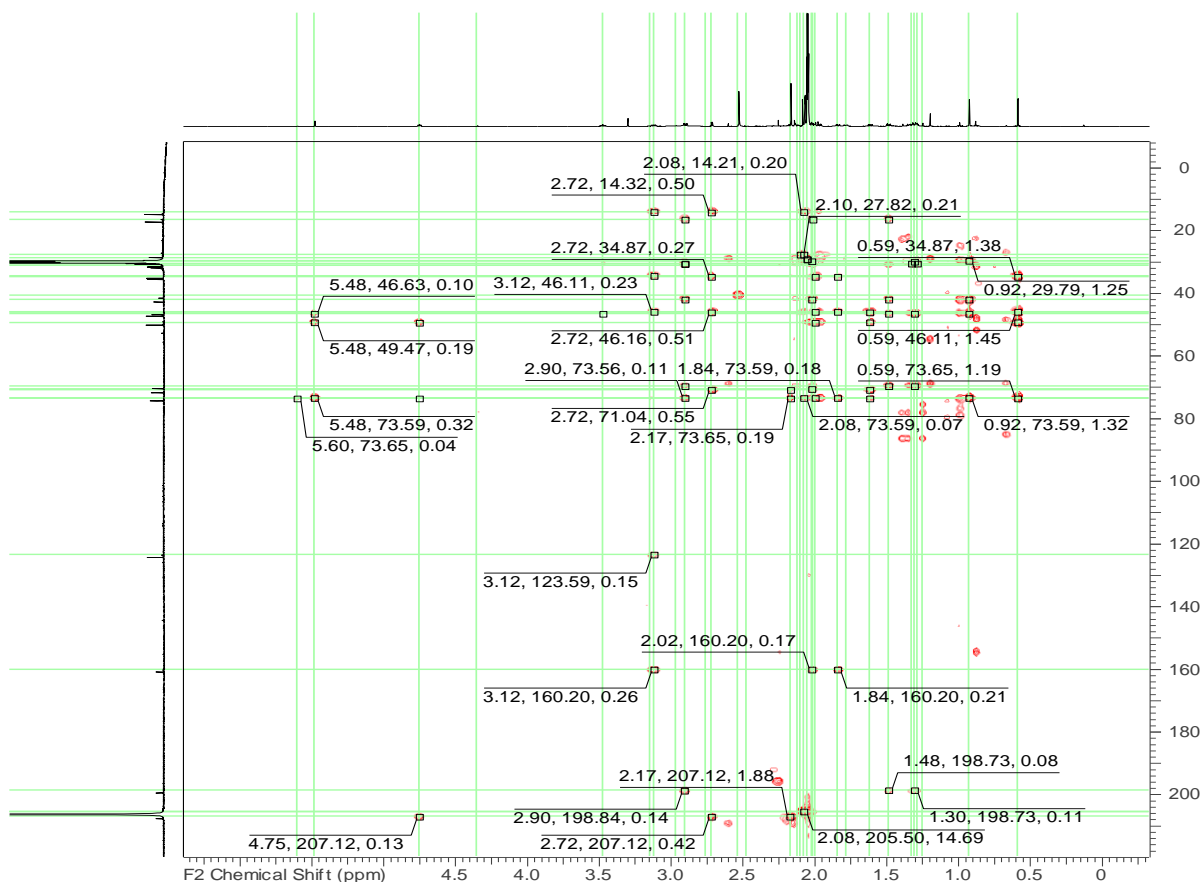

Figure 6:  $^1\text{H}$ ,  $^1\text{H}$  COSY spectrum of Aethiopinolone A (**1**) in acetone- $d_6$  (500 MHz):

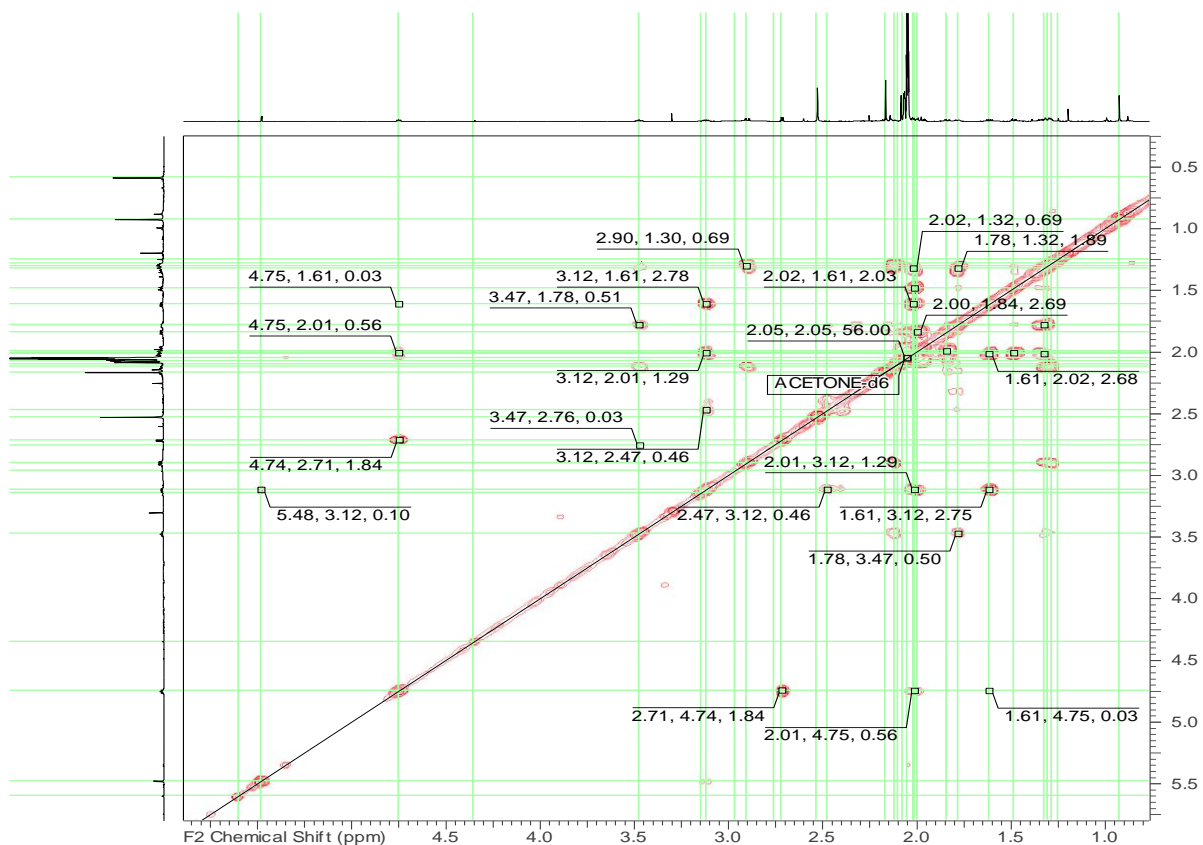



Figure 7:  $^1\text{H}$ ,  $^1\text{H}$  ROESY spectrum of Aethiopinolone A (**1**) in acetone- $d_6$  (500 MHz)

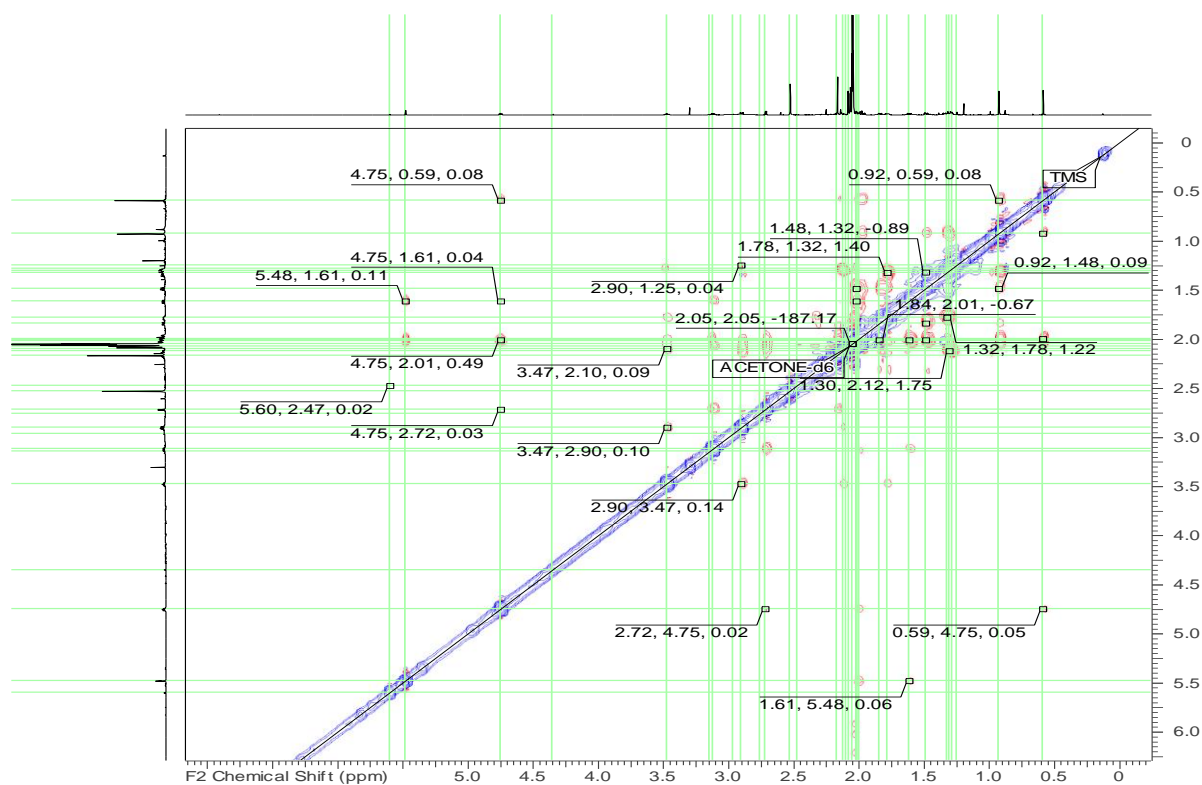

Figure 8: HRMS spectrum of Aethiopinolone A (**1**)

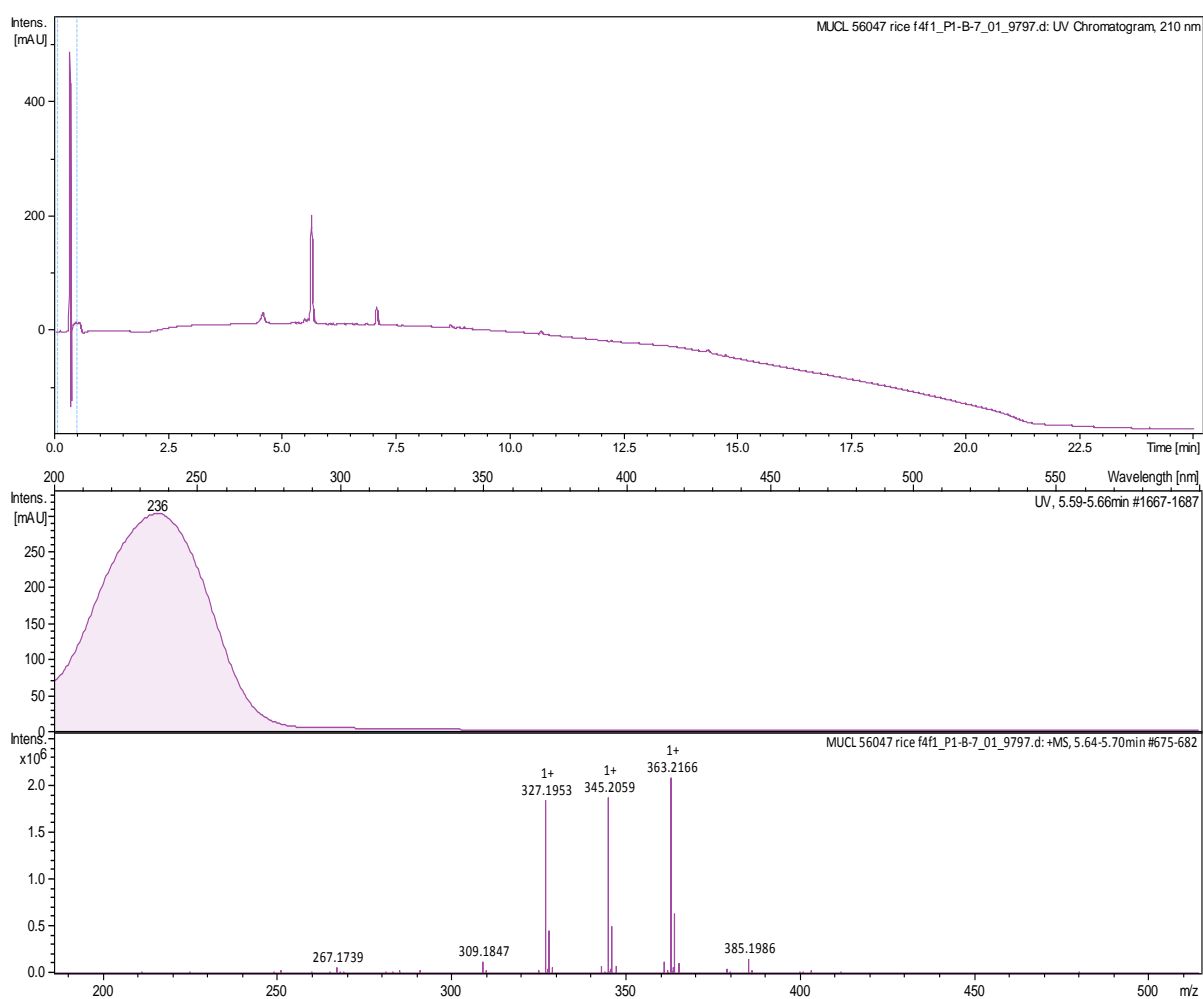

Figure 9:  $^1\text{H}$  NMR spectrum of Aethiopinolone A (1) (S)- MTPA ester in chloroform -d (700 MHz)

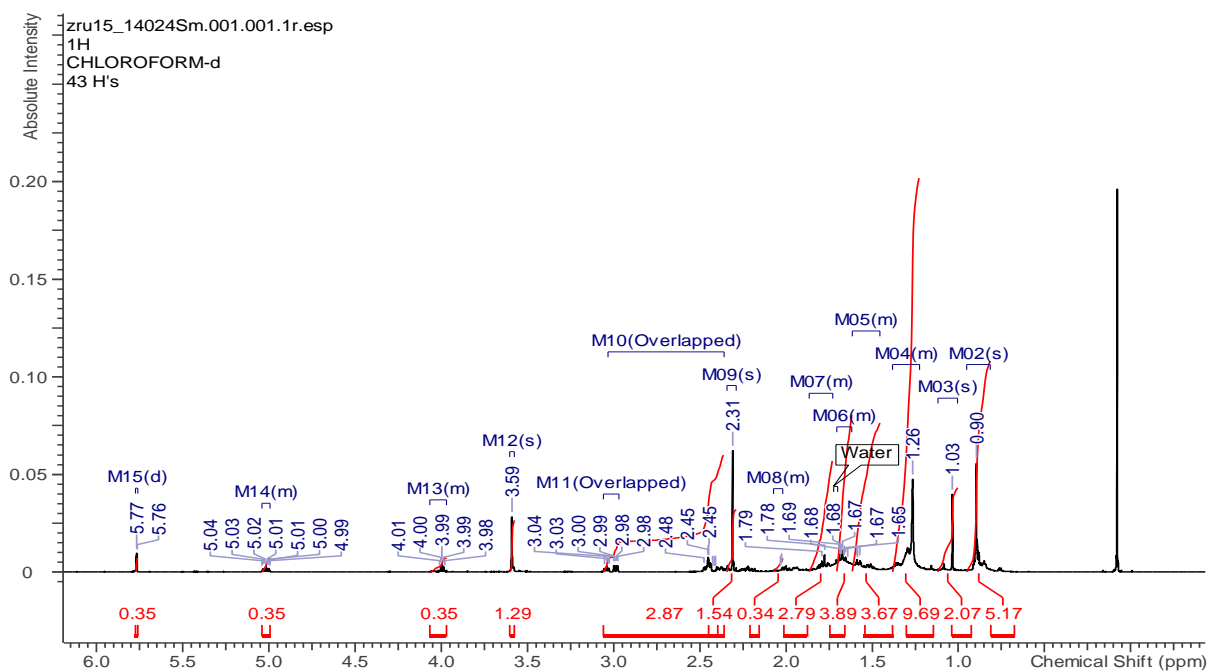

Figure 10:  $^1\text{H}$ ,  $^1\text{H}$  COSY NMR spectrum of Aethiopinolone A (1) (S)- MTPA ester in chloroform -d (700 MHz)

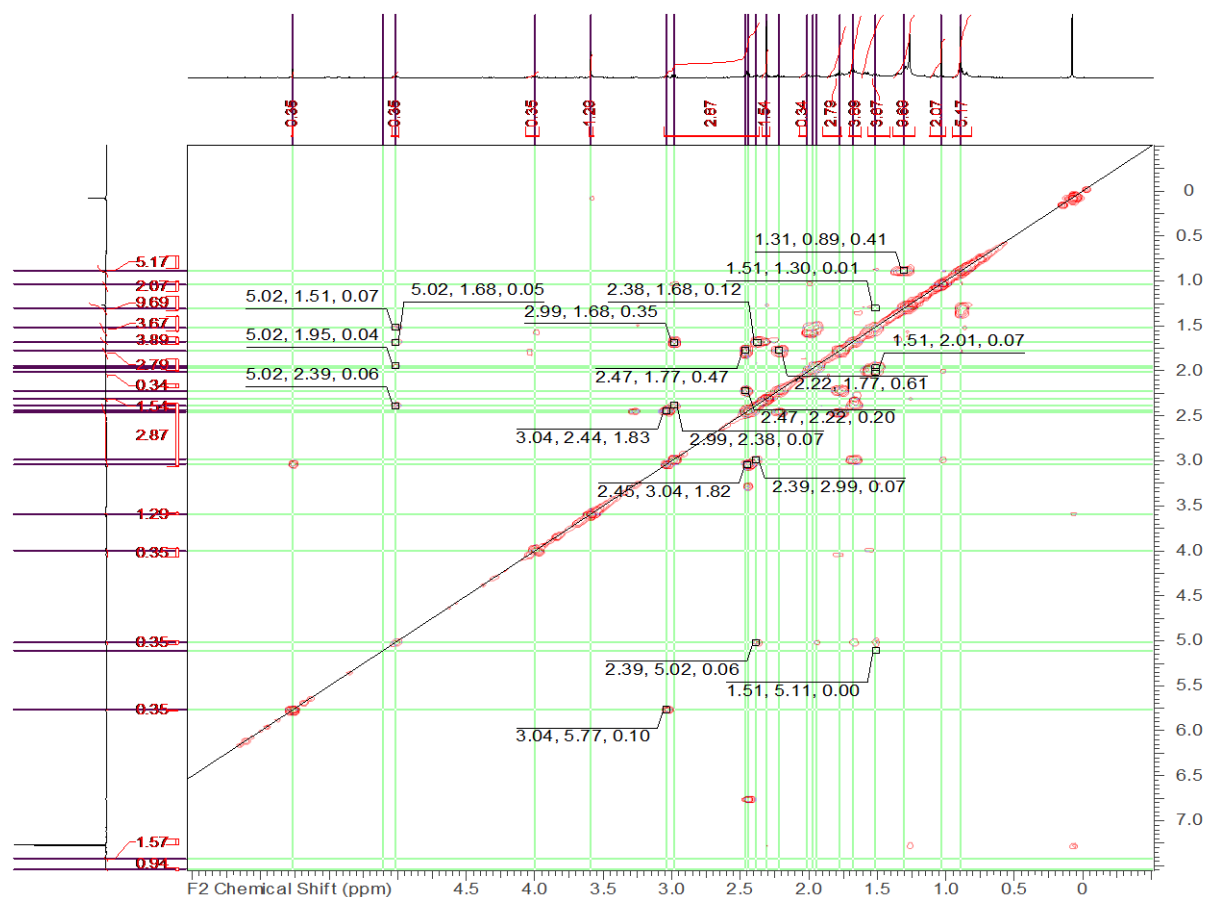

Figure 11:  $^1\text{H}$  NMR spectrum of Aethiopinolone A (1) (*R*)- MTPA ester in chloroform -d (700 MHz)

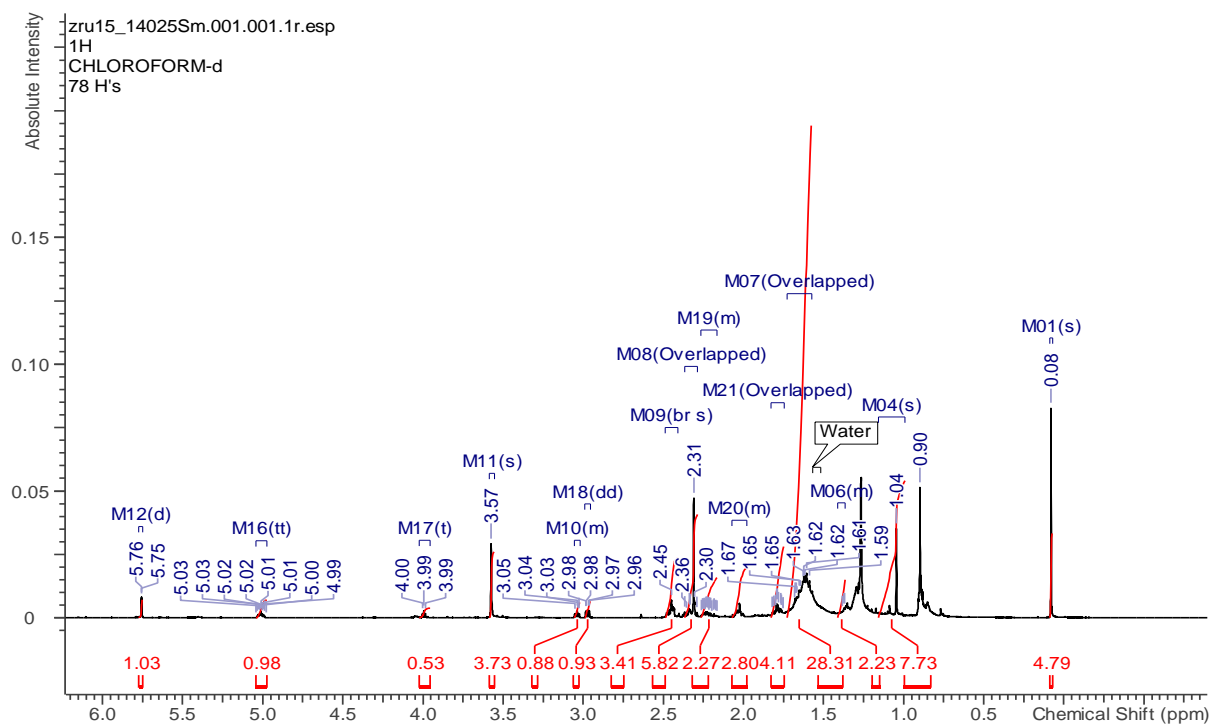

Figure 12:  $^1\text{H}$ ,  $^1\text{H}$  COSY NMR spectrum of Aethiopinolone A (1) (*R*)- MTPA ester in chloroform -d (700 MHz)

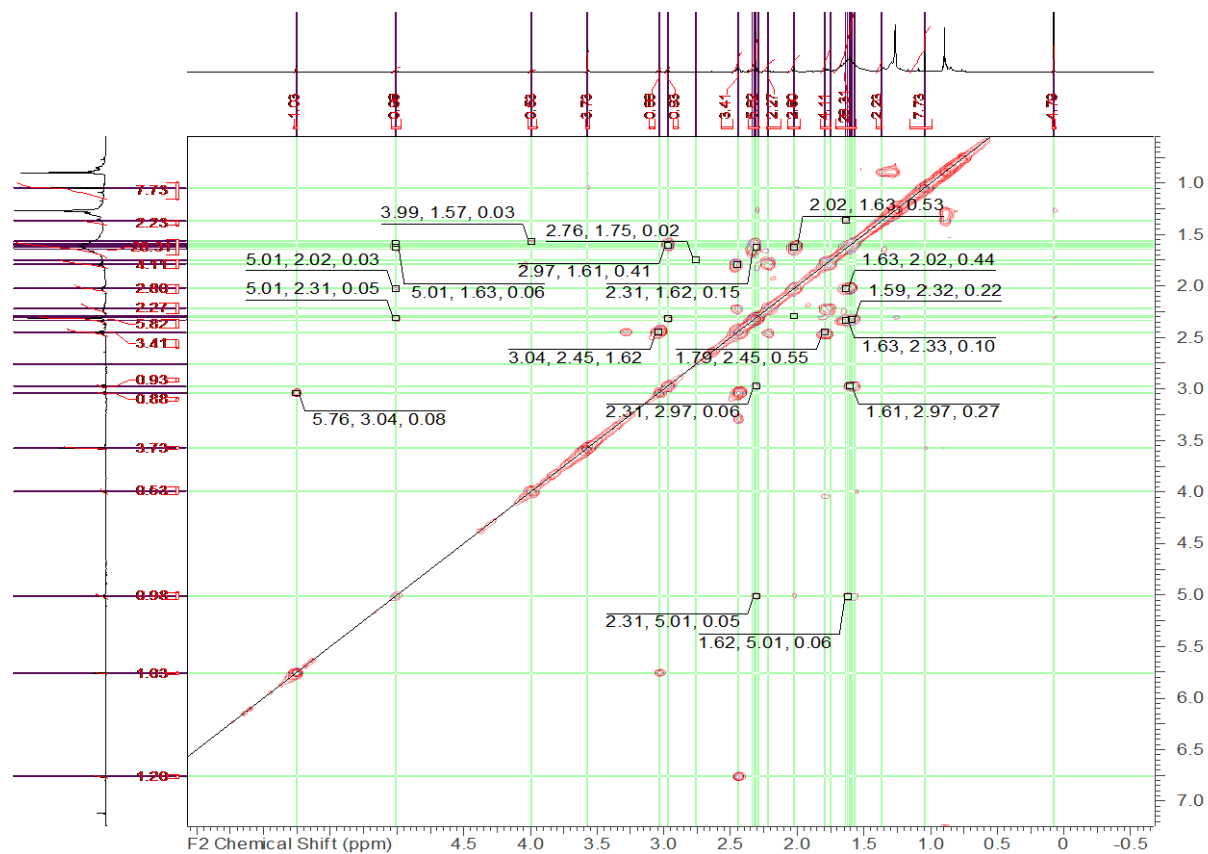

# 1 and 2D NMR data for Aethiopinolone B (2)

Figure 13: <sup>1</sup>H NMR spectrum of Aethiopinolone B (2) in DMSO-d<sub>6</sub> (500 MHz)

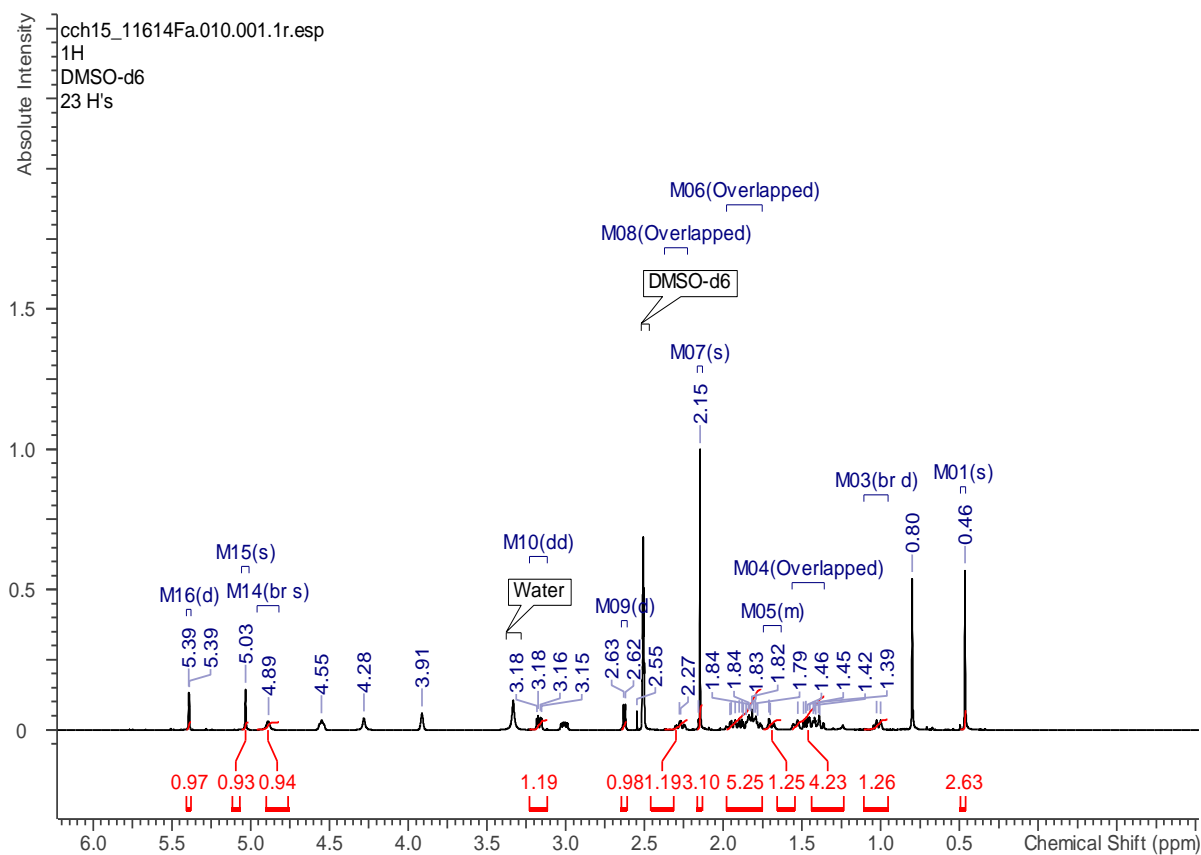

Figure 14: <sup>13</sup>C NMR spectrum of Aethiopinolone B (2) in DMSO-d<sub>6</sub> (125 MHz)

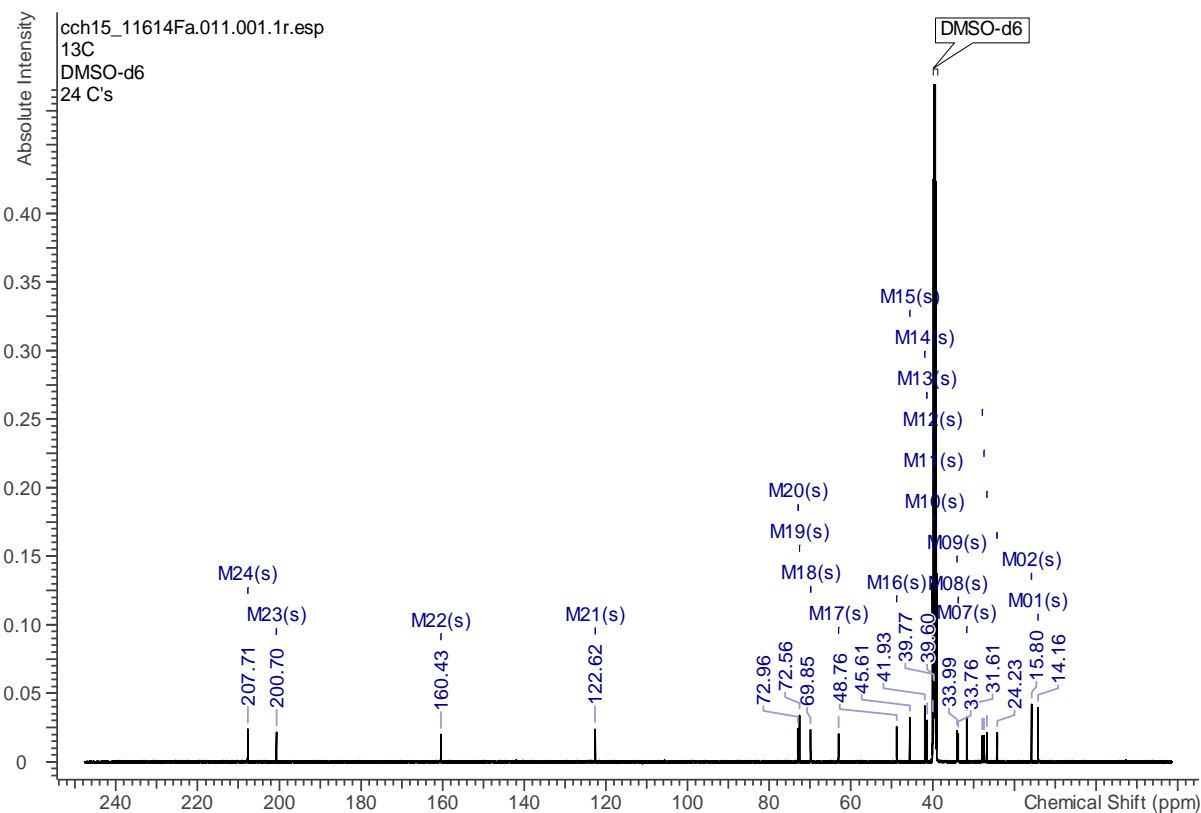

Figure 15: DEPT NMR spectrum of Aethiopinolone B (2) in in DMSO-d<sub>6</sub> (125 MHz)

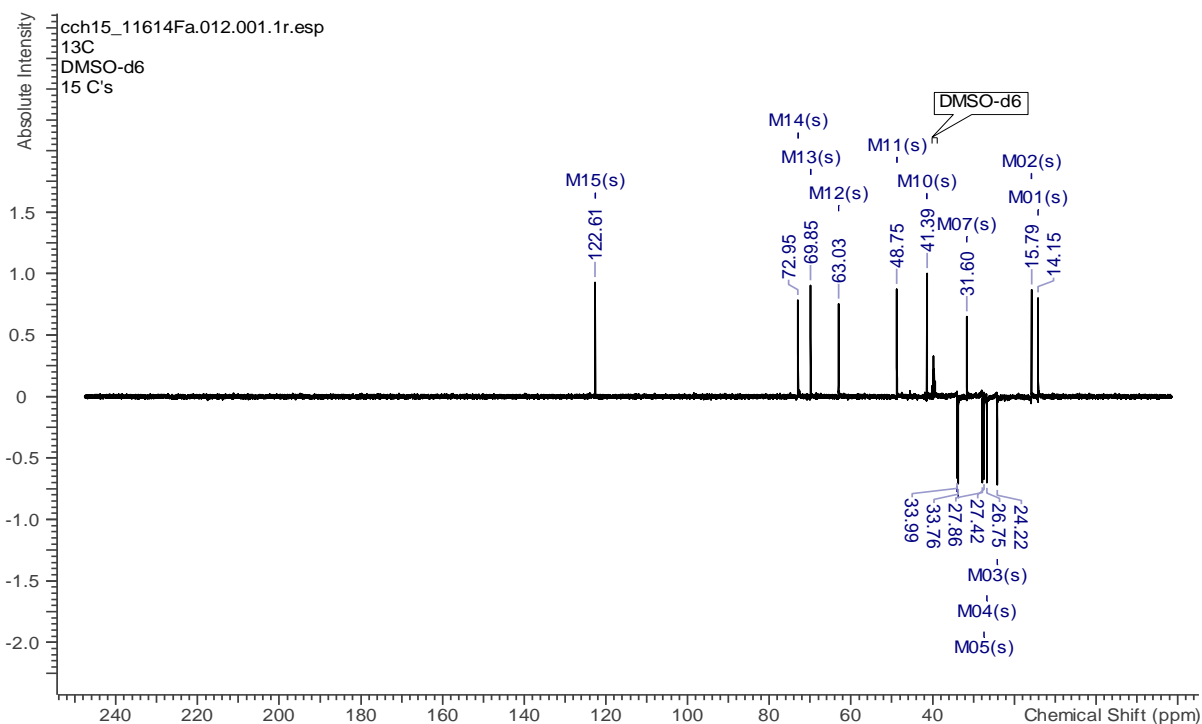

Figure 16: <sup>1</sup>H, <sup>13</sup>C HSQC spectrum of Aethiopinolone B (2) in in DMSO-d<sub>6</sub> (500 MHz, 125 MHz)

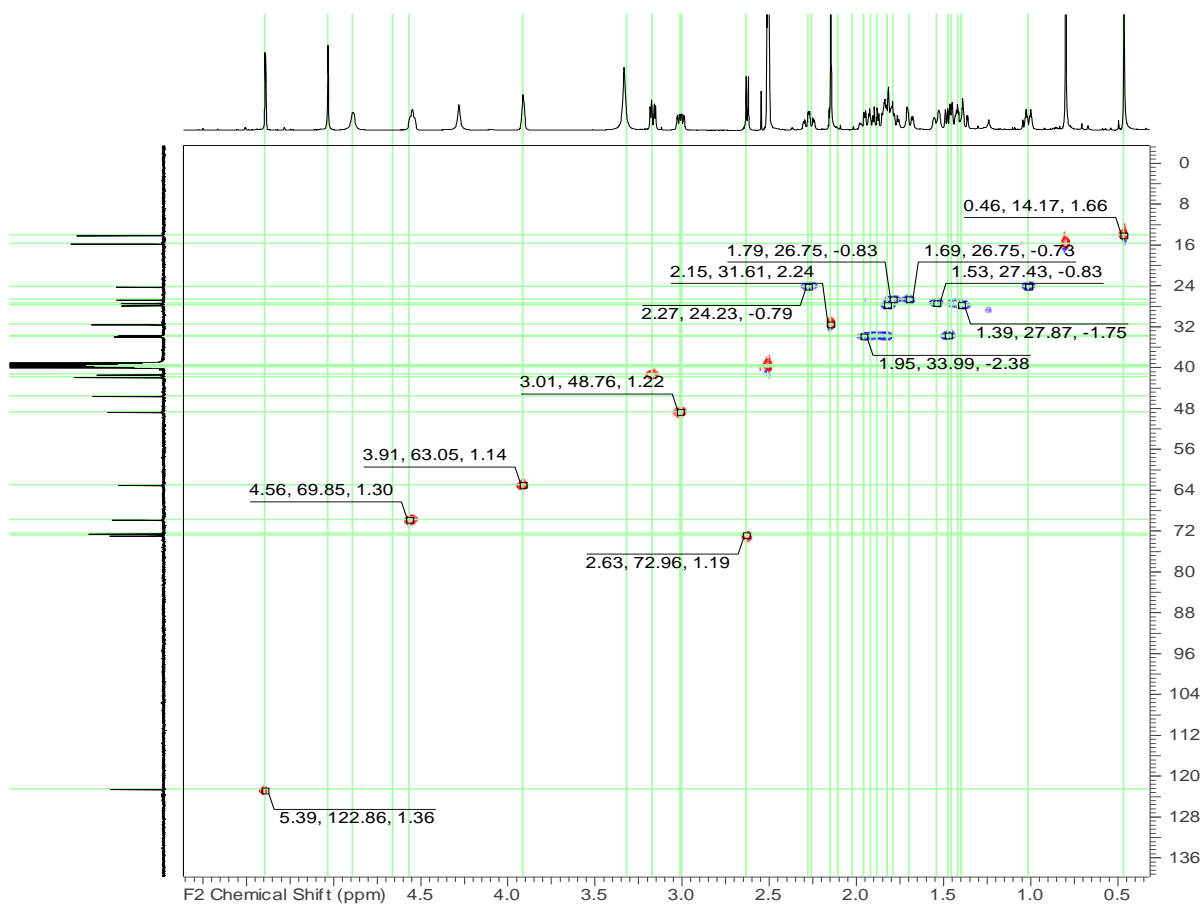

Figure 17:  $^1\text{H}$ ,  $^{13}\text{C}$  HMBC spectrum of Aethiopinolone B (2) in in DMSO- $d_6$  (500 MHz, 125 MHz)

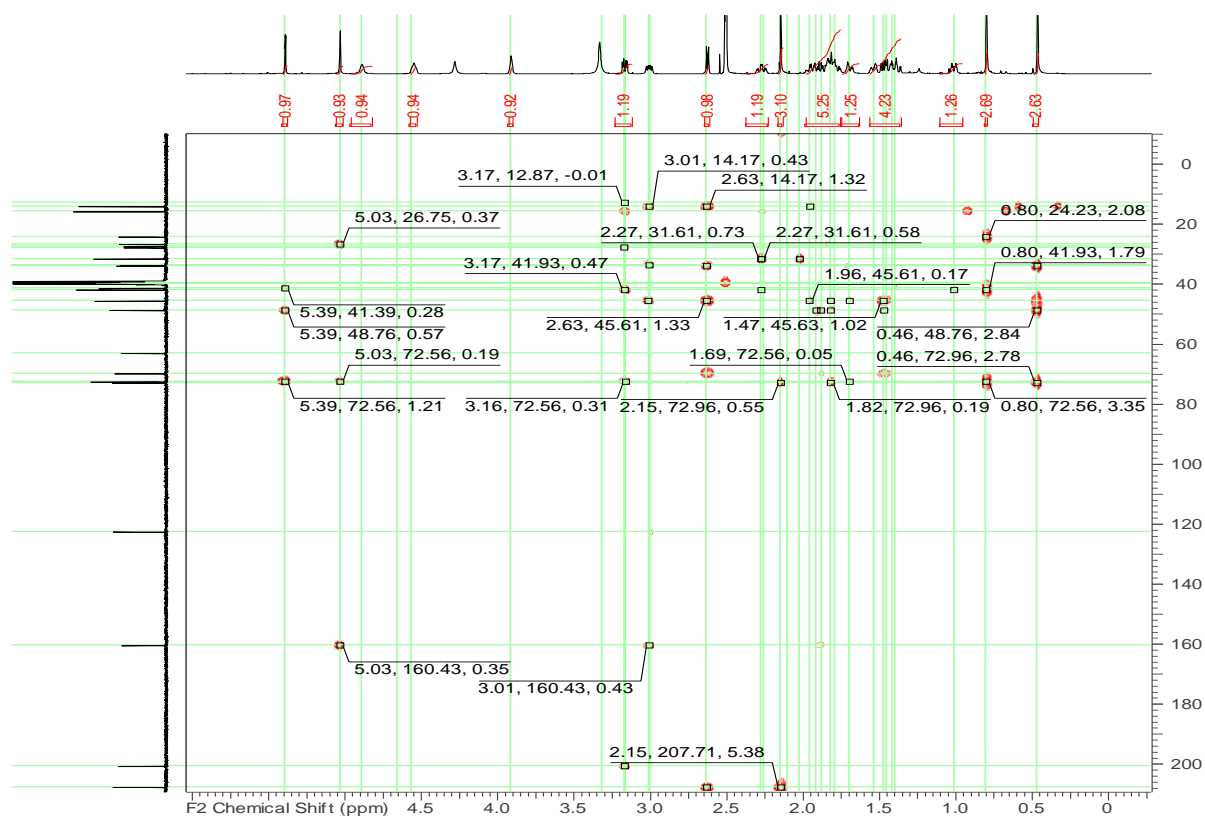

Figure 18:  $^1\text{H}$ ,  $^1\text{H}$  COSY spectrum of Aethiopinolone B (2) in in DMSO- $d_6$  (500 MHz)

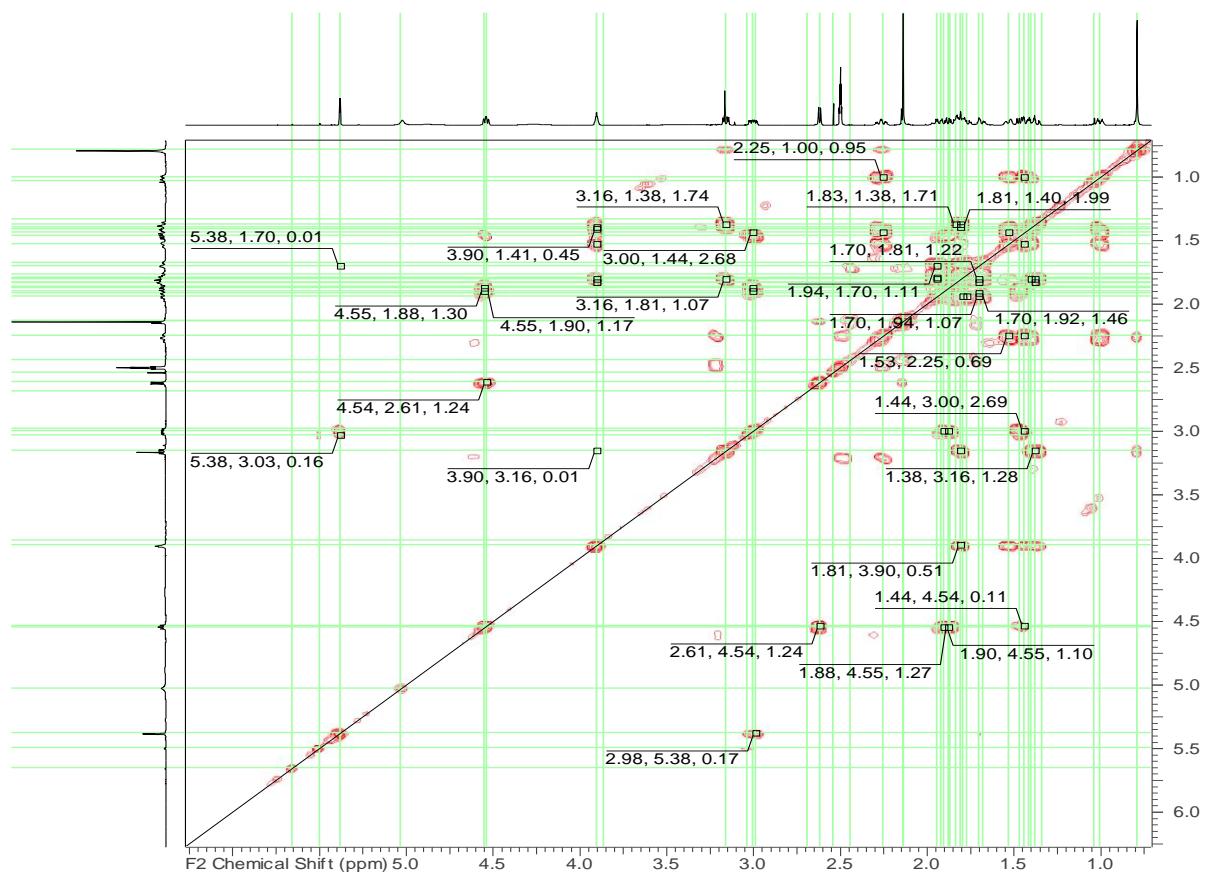

Figure 19:  $^1\text{H}$ ,  $^1\text{H}$  ROESY spectrum of Aethiopinolone B (2) in in DMSO- $d_6$  (500 MHz)

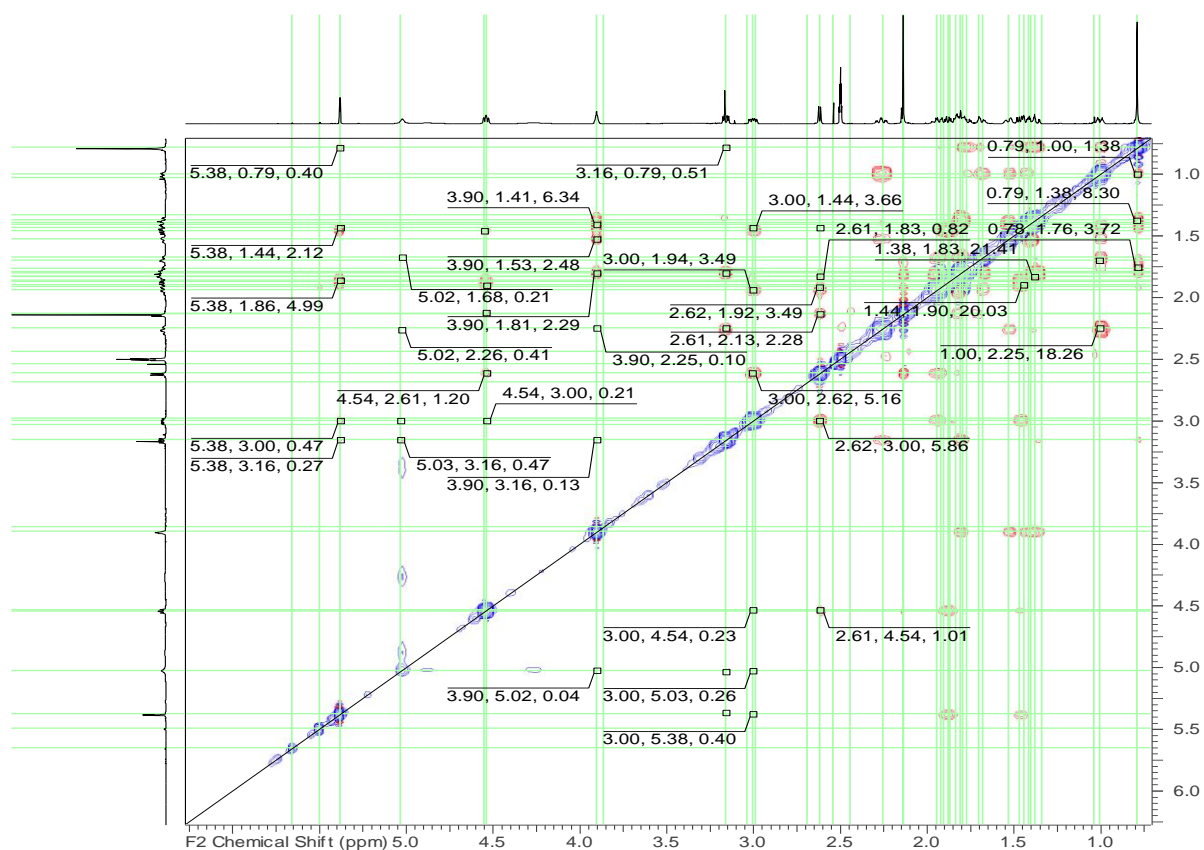

Figure 20: HRMS spectrum of Aethiopinolone B (2)

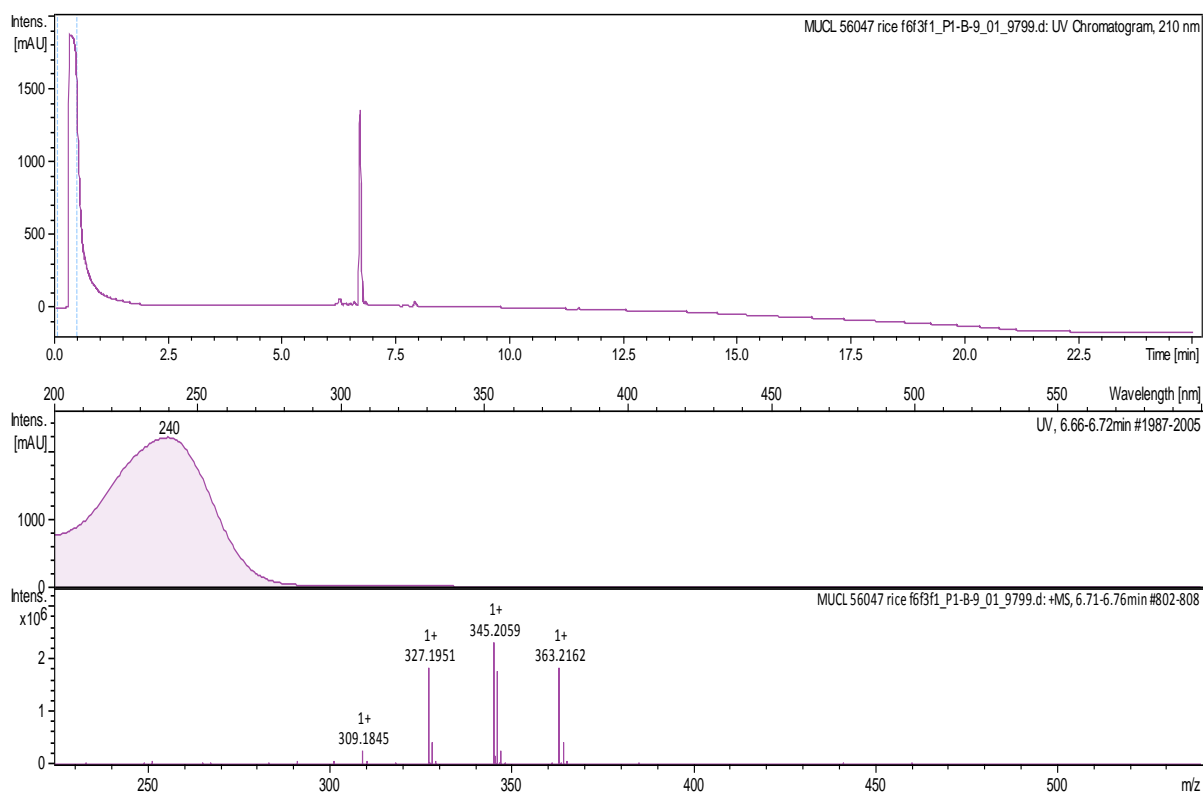

# 1 and 2D NMR data for Aethiopinolone C (3)

Figure 21: <sup>1</sup>H NMR spectrum of Aethiopinolone C (3) in acetone-d<sub>6</sub> (500 MHz)

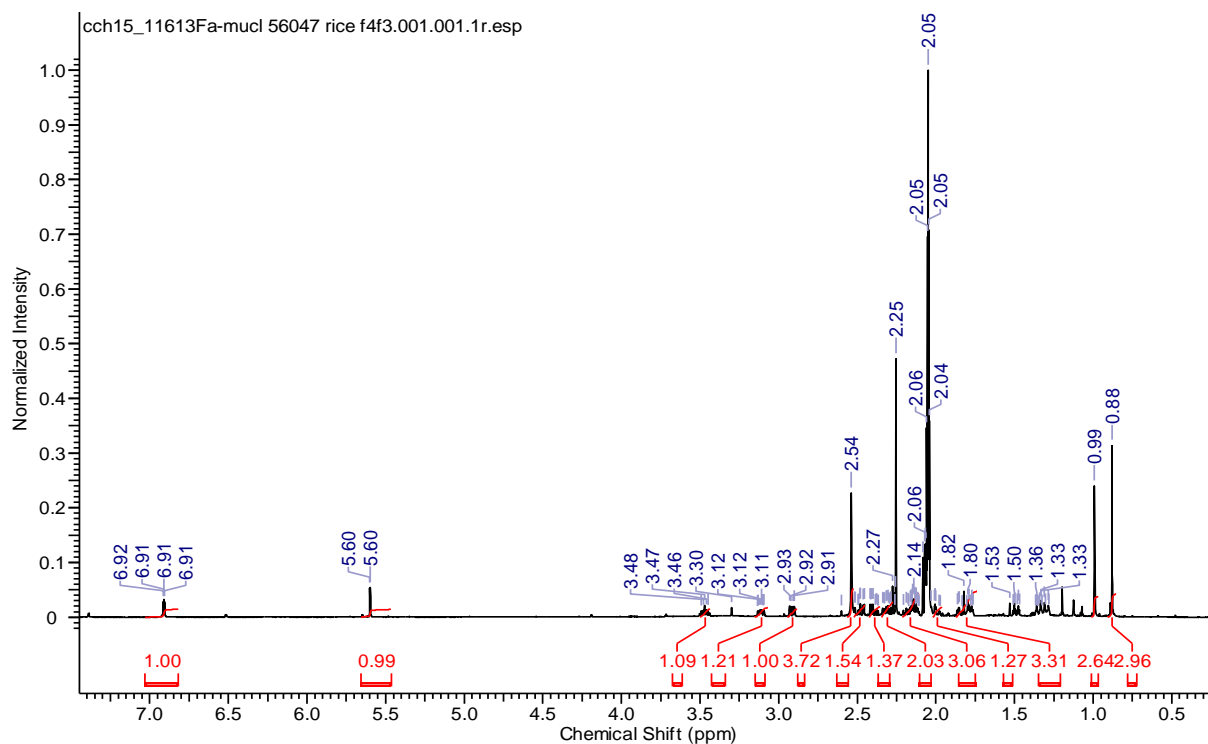

Figure 22: <sup>13</sup>C NMR spectrum of Aethiopinolone C (3) in acetone-d<sub>6</sub> (125 MHz)

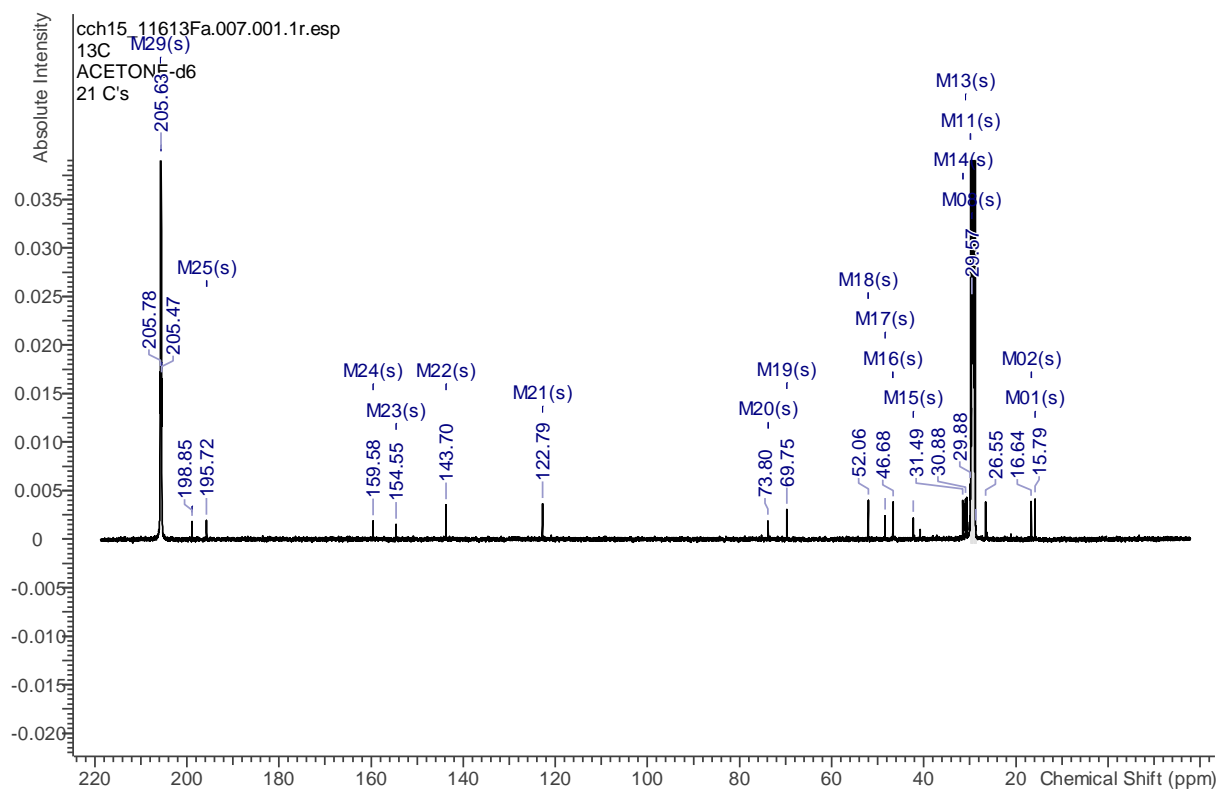



Figure 23: DEPT NMR spectrum of Aethiopinolone C (3) in acetone-d<sub>6</sub> (125 MHz)

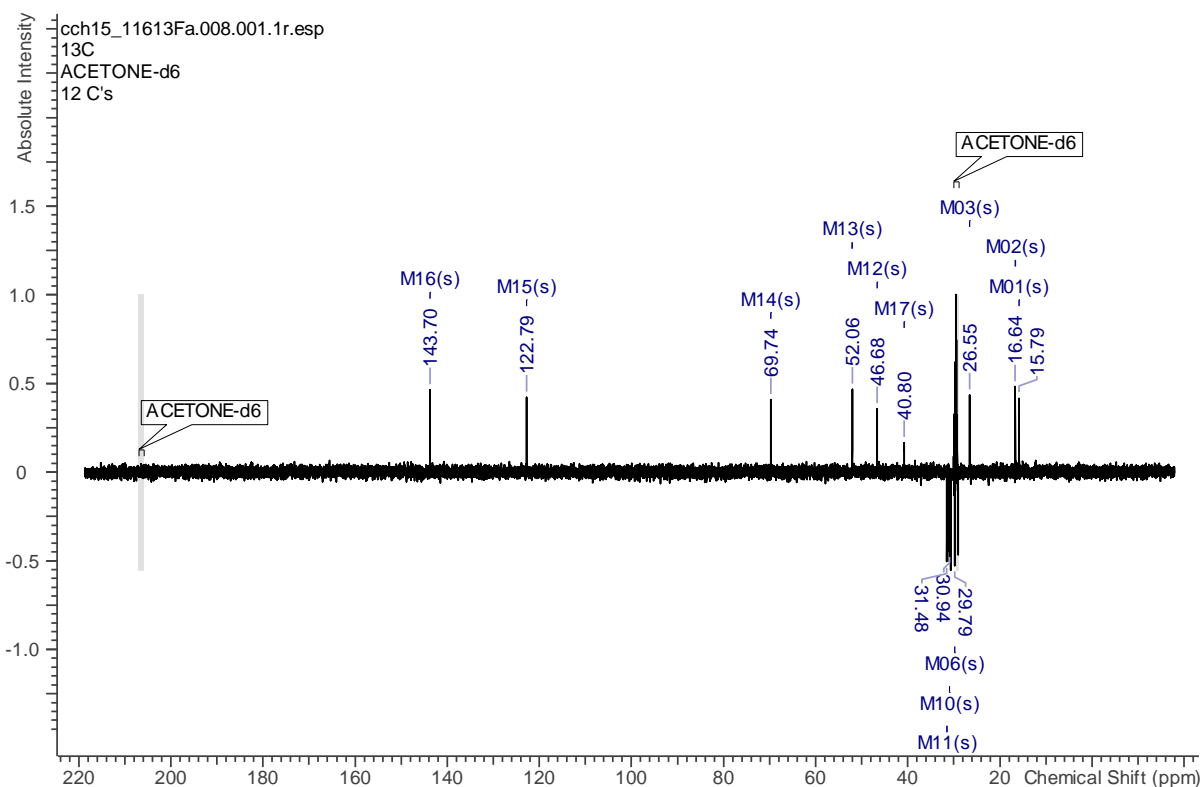

Figure 24: <sup>1</sup>H, <sup>13</sup>C HSQC spectrum of Aethiopinolone C (3) in acetone-d<sub>6</sub> (500MHz, 125 MHz)

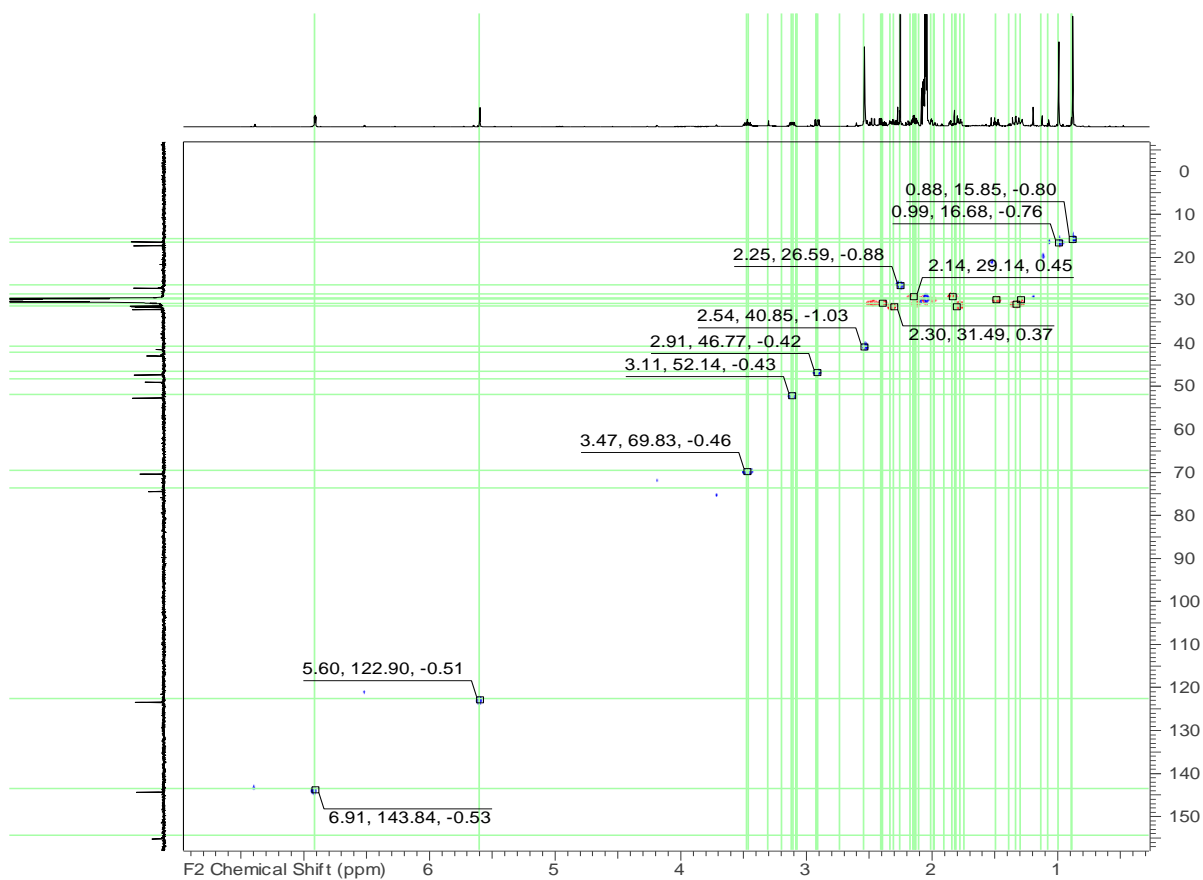

Figure 25:  $^1\text{H}$ ,  $^{13}\text{C}$  HMBC spectrum of Aethiopinolone C (3) in acetone- $d_6$  (500MHz, 125 MHz)

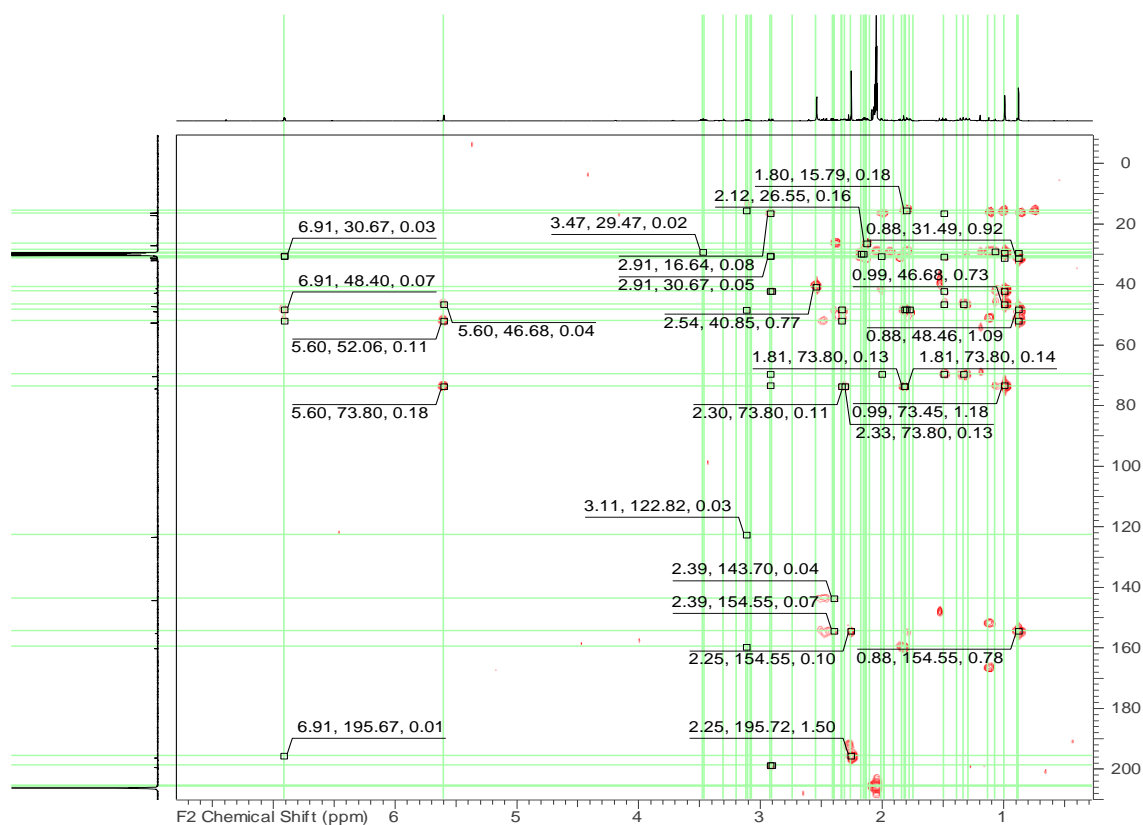

Figure 26:  $^1\text{H}$ ,  $^1\text{H}$  COSY spectrum of Aethiopinolone C (3) in acetone- $d_6$  (500MHz)

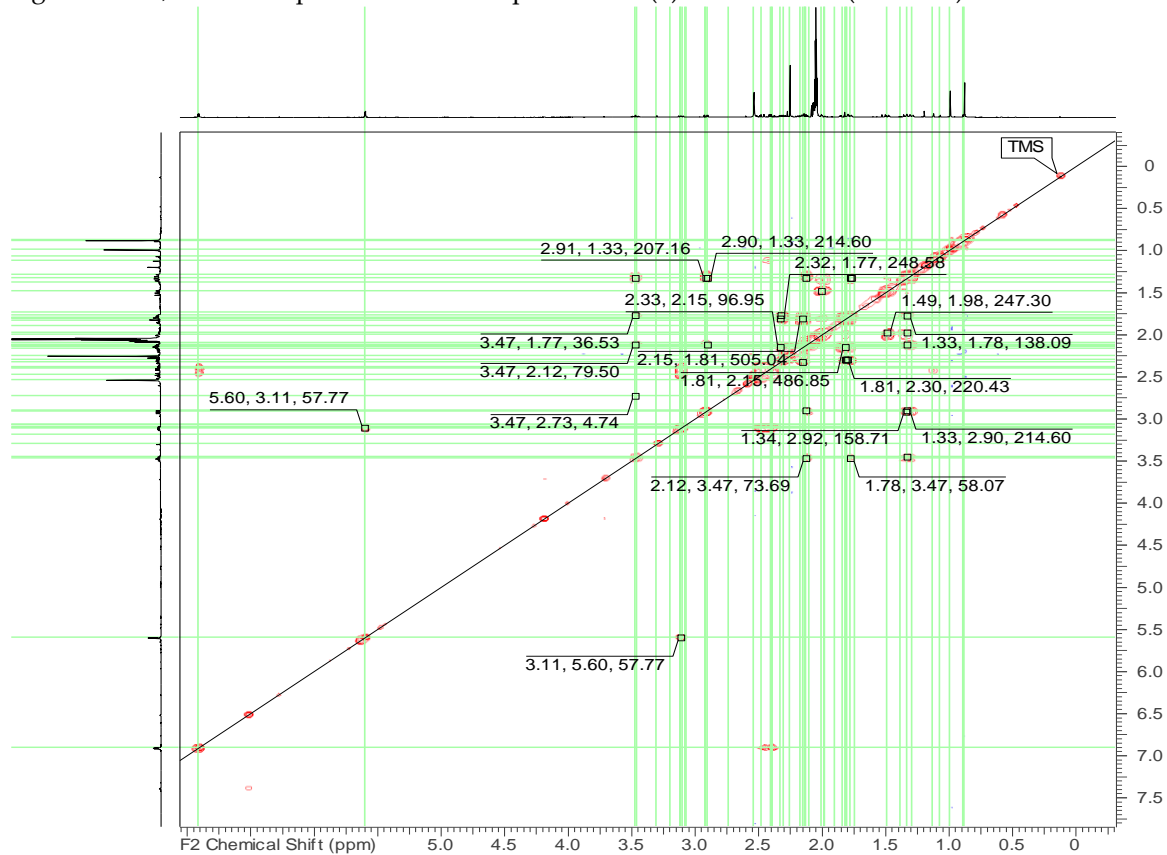

Figure 27:  $^1\text{H}$ ,  $^1\text{H}$  ROESY spectrum of Aethiopinolone C (3) in acetone- $d_6$  (500MHz)

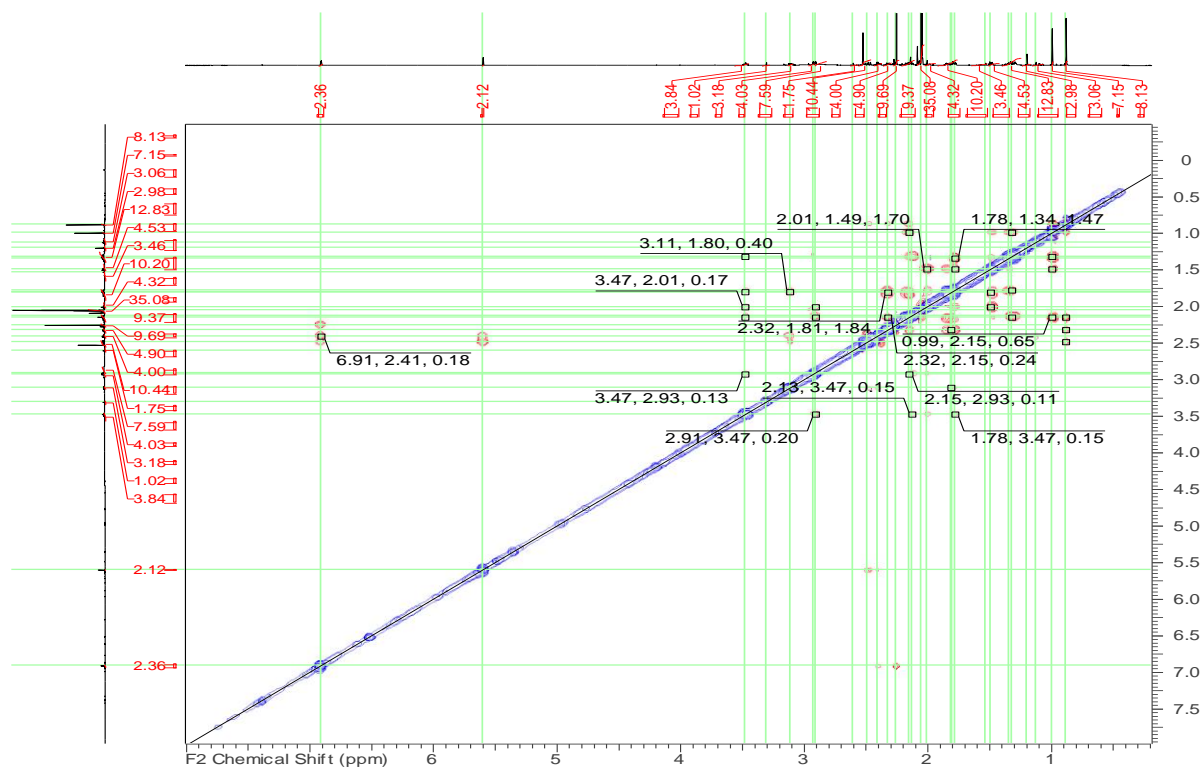

Figure 28: HRMS data for Aethiopinolone C (3)

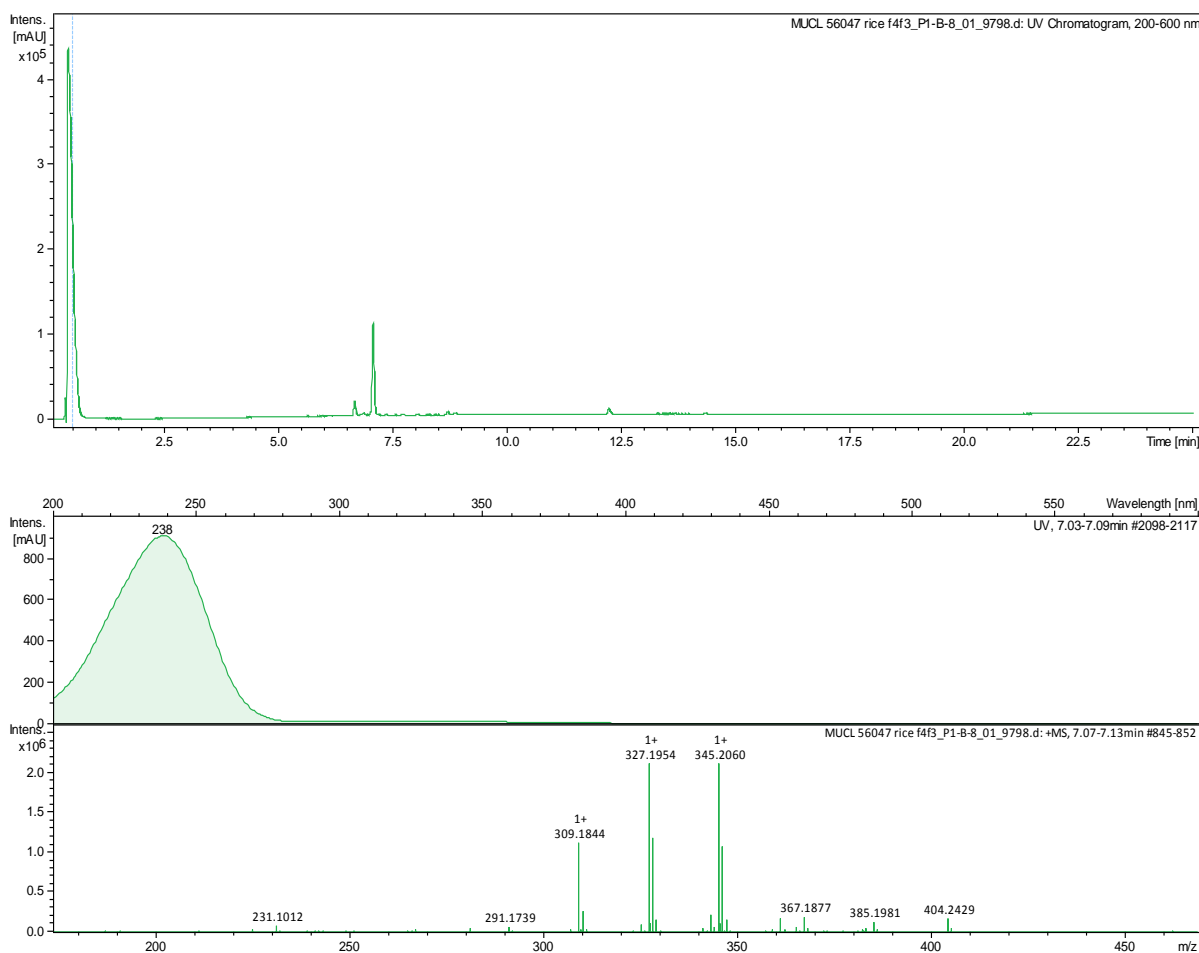

Figure 29:  $^1\text{H}$  NMR spectrum of Aethiopinolone C (3) (*S*)- MTPA ester in pyridine- $d_5$  (700 MHz)

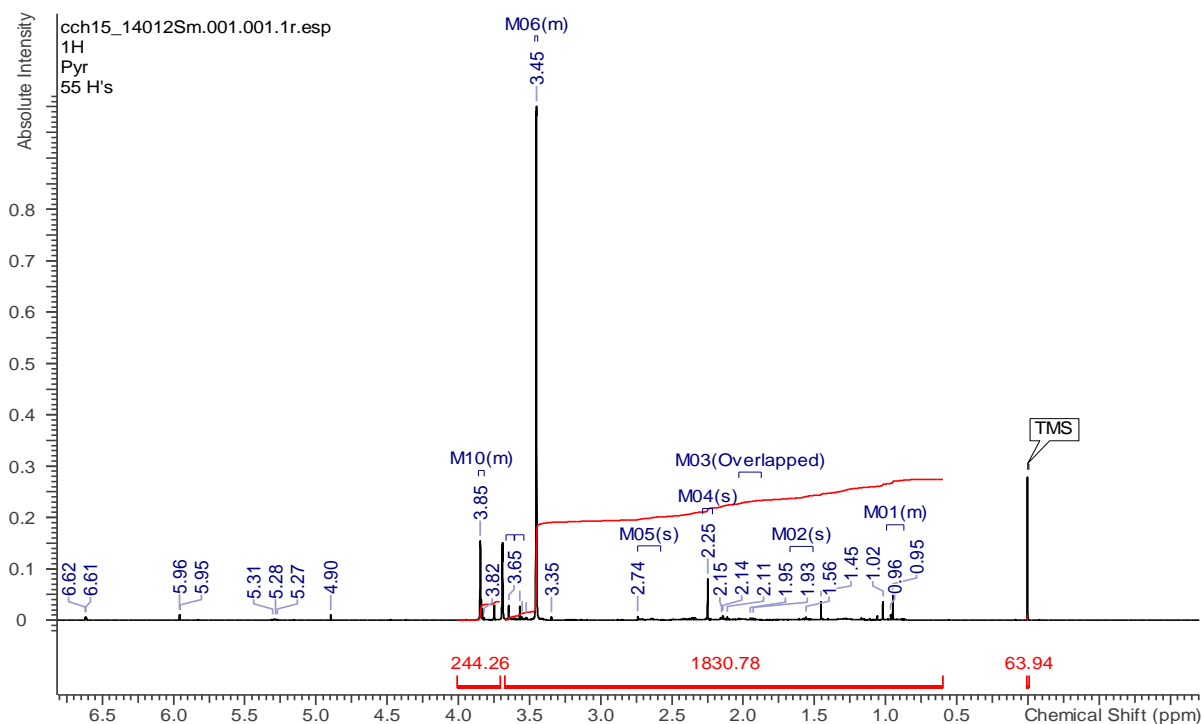

Figure 30:  $^1\text{H}$ ,  $^1\text{H}$ COSY spectrum of Aethiopinolone C (3) (*S*)- MTPA ester in pyridine- $d_5$  (700 MHz)

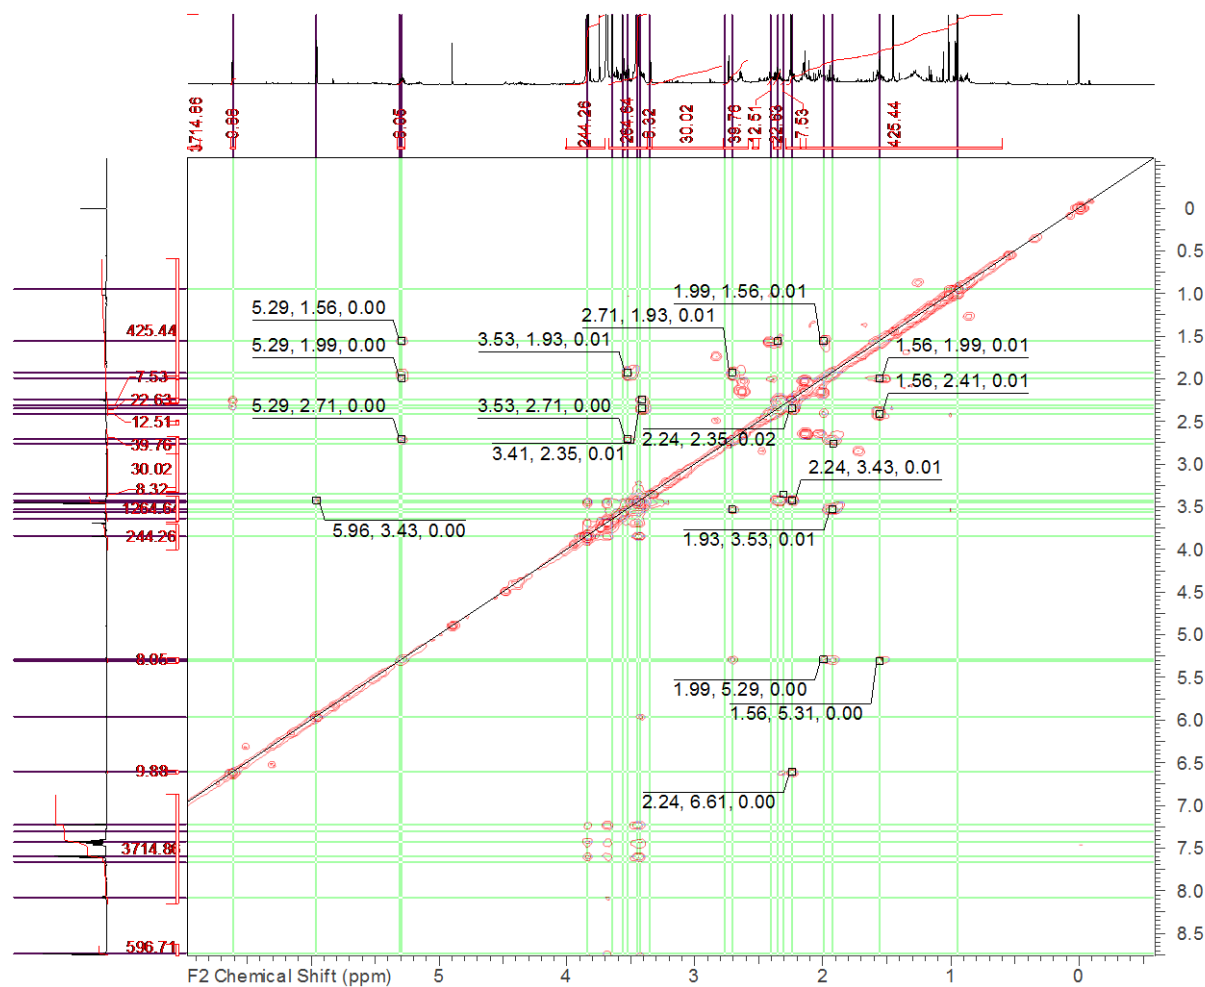

Figure 31:  $^1\text{H}$  NMR spectrum of Aethiopinolone C (3) (*R*)- MTPA ester in pyridine- $d_5$  (700 MHz)

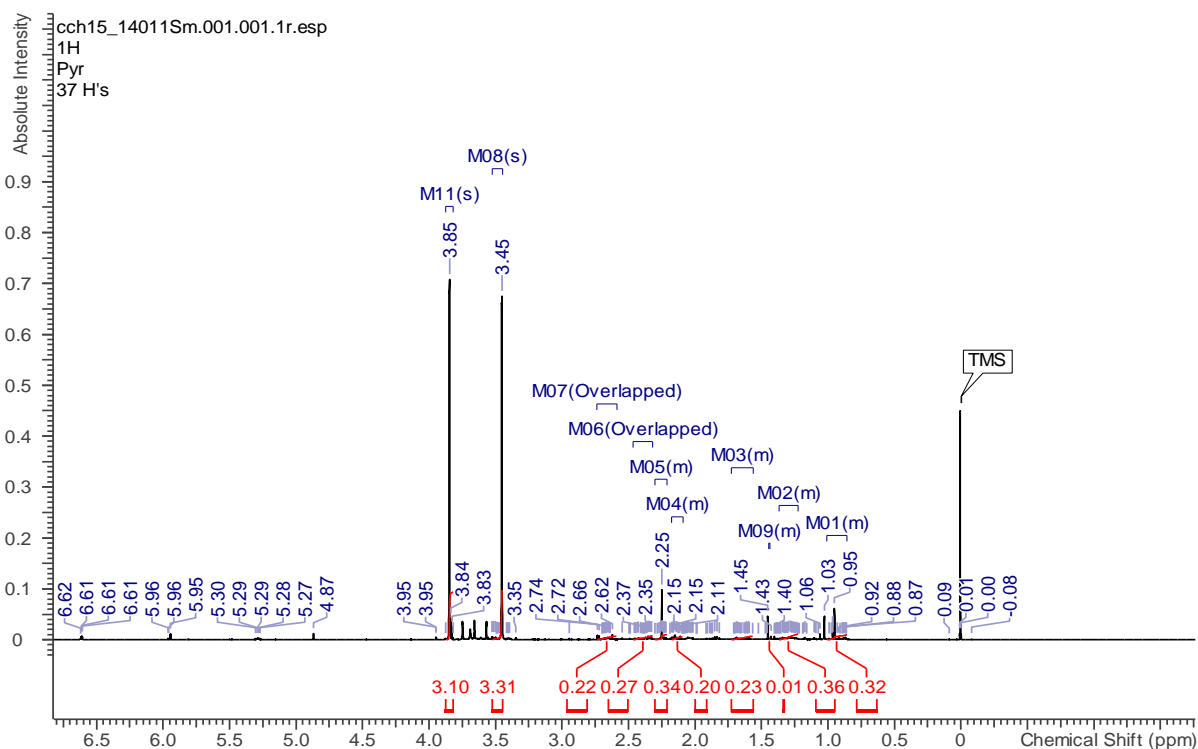

Figure 32:  $^1\text{H}$ ,  $^1\text{H}$  COSY spectrum of Aethiopinolone C (3) (*R*)- MTPA ester in pyridine- $d_5$  (700 MHz)

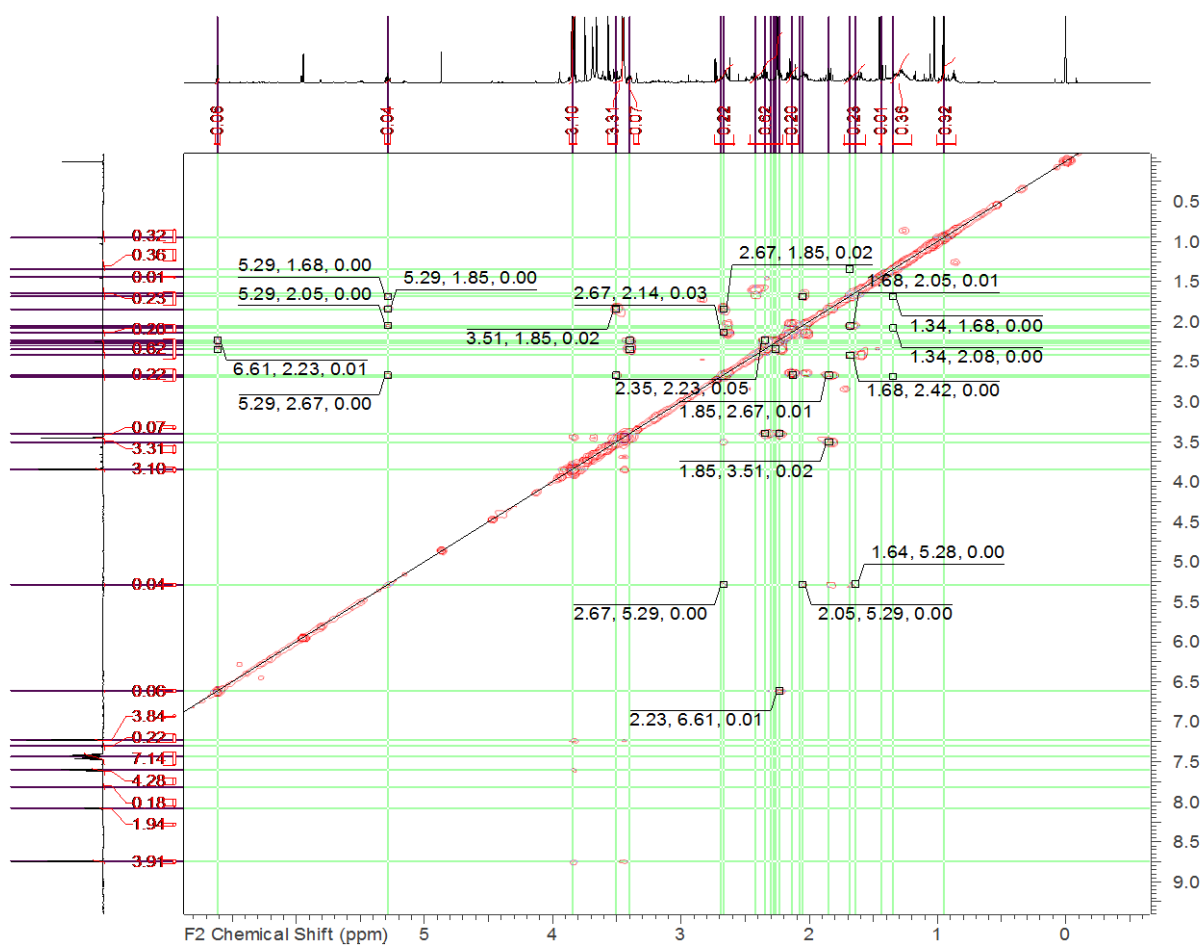

# 1 and 2D NMR data for Aethiopinolone D (4)

Figure 33: <sup>1</sup>H NMR spectrum for Aethiopinolone D (4) in acetone-d<sub>6</sub> (175 MHz)

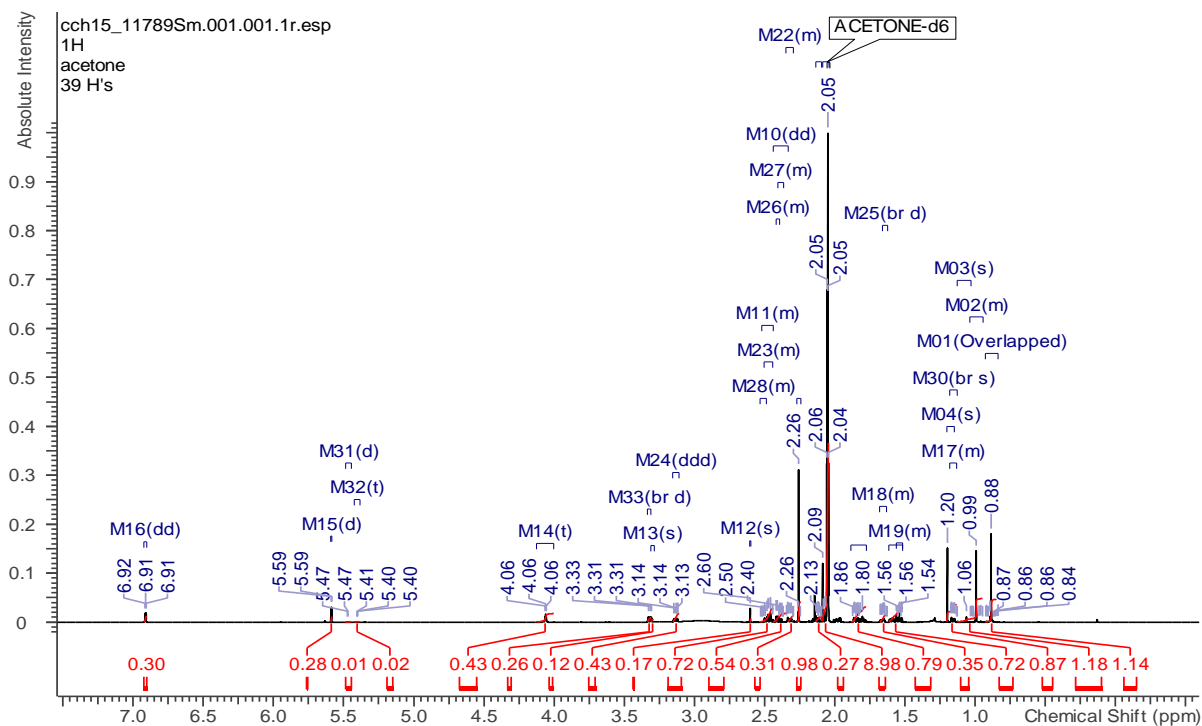

Figure 34: <sup>13</sup>C NMR spectrum of Aethiopinolone D (4) in acetone-d<sub>6</sub> (175 MHz)

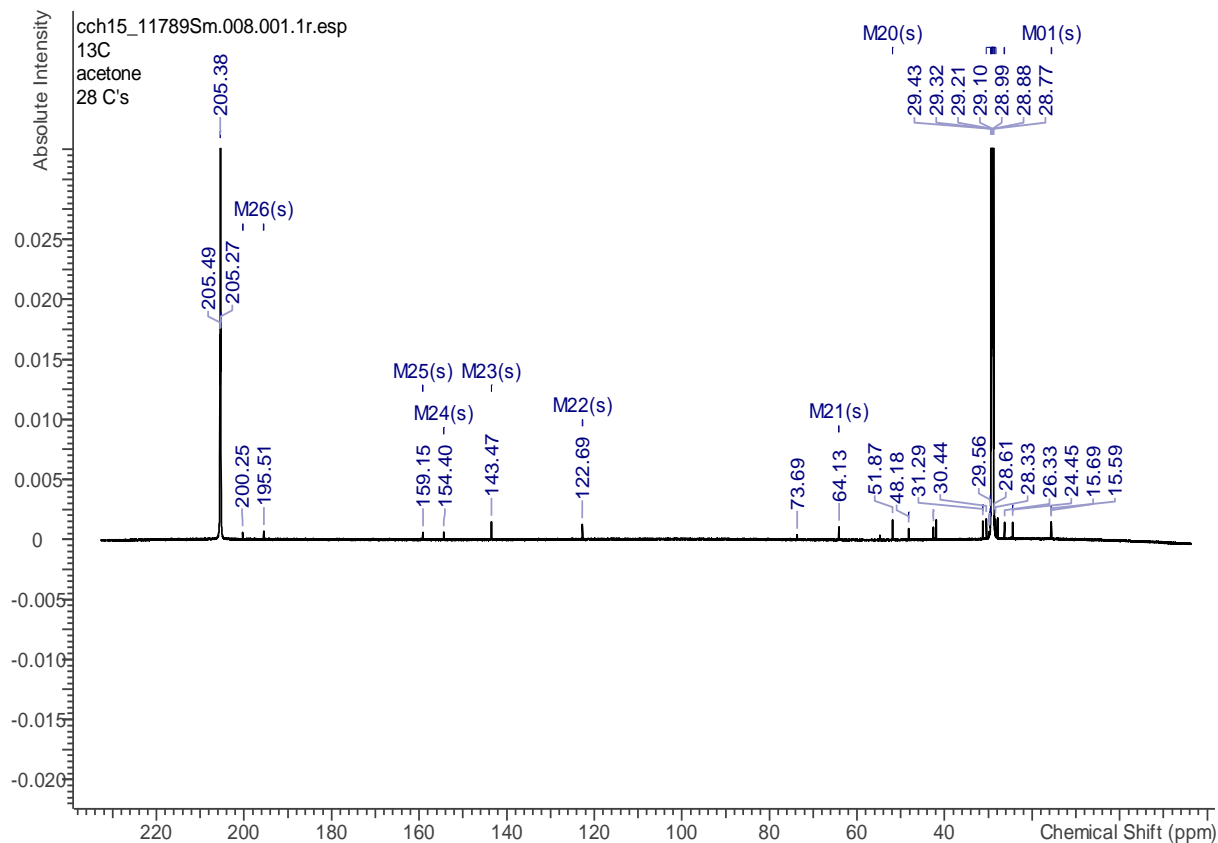

Figure 35: DEPT NMR spectrum of Aethiopinolone D (4) in acetone-d<sub>6</sub> (175 MHz)

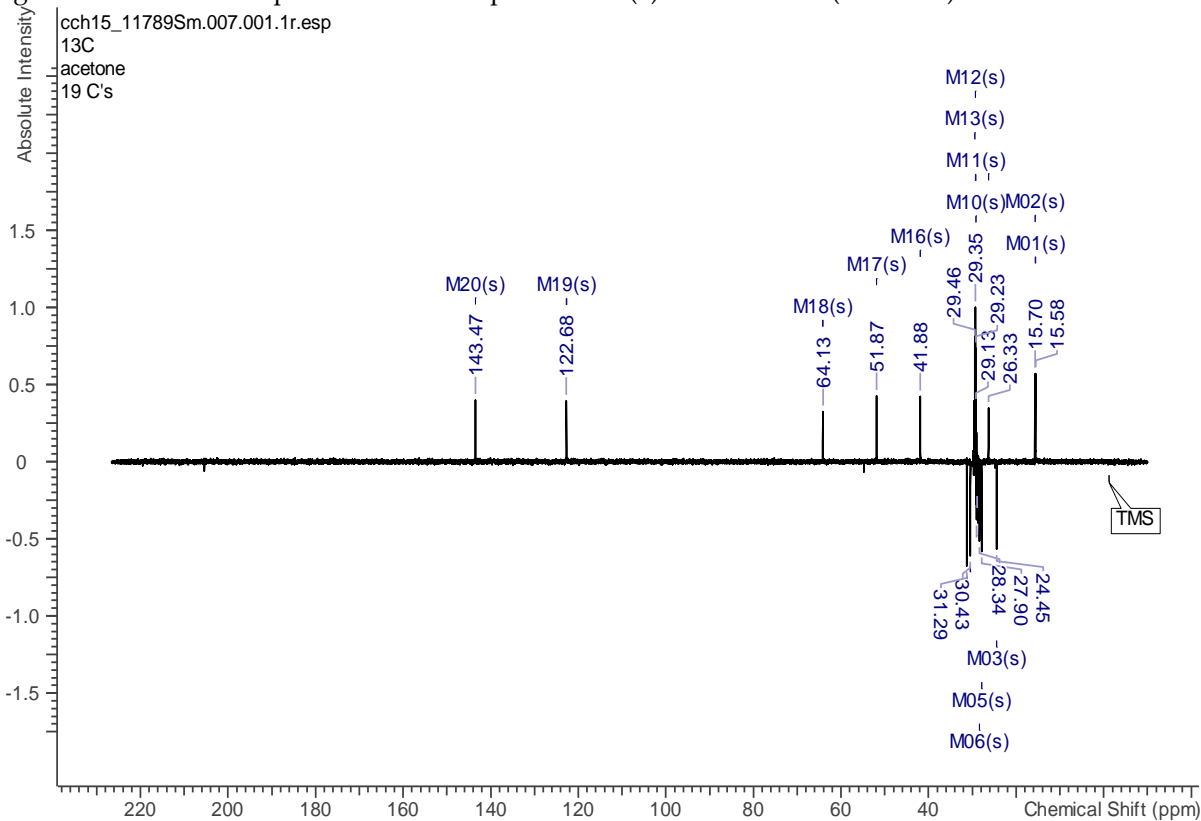

Figure 36: <sup>1</sup>H, <sup>13</sup>C HSQC spectrum of Aethiopinolone D (4) in acetone-d<sub>6</sub> (700 MHz, 175 MHz)

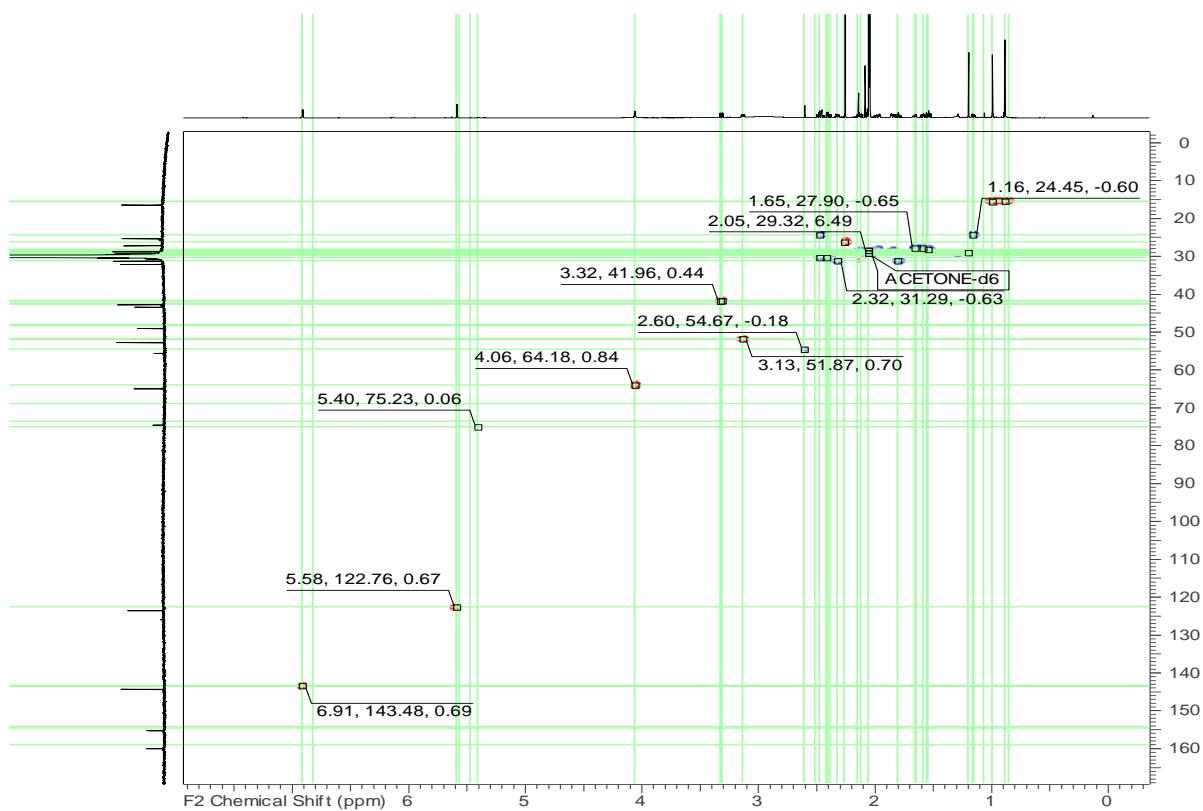

Figure 37:  $^1\text{H}$ ,  $^{13}\text{C}$  HMBC spectrum of Aethiopinolone D (4) in acetone- $d_6$  (700 MHz, 175 MHz)

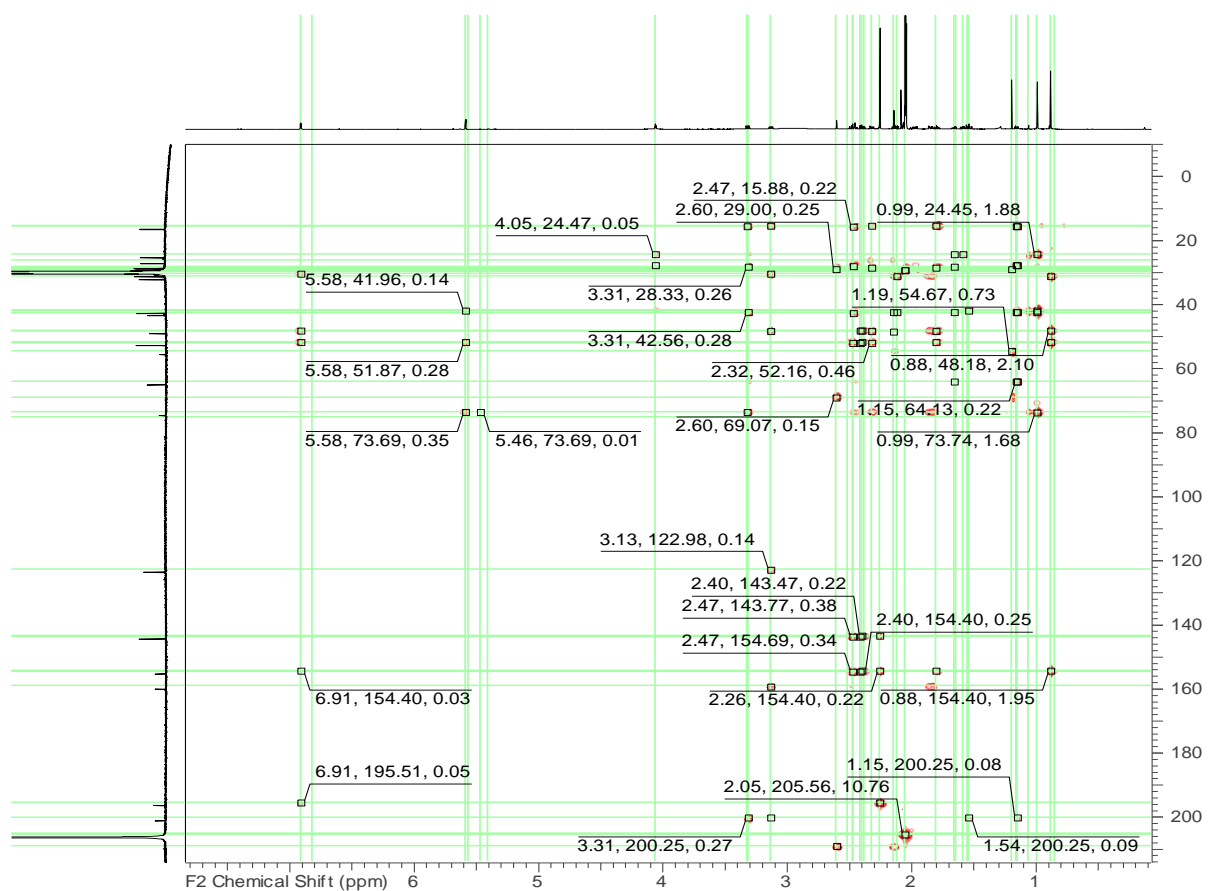

Figure 38:  $^1\text{H}$ ,  $^1\text{H}$  COSY spectrum of Aethiopinolone D (4) in acetone- $d_6$  (700 MHz)

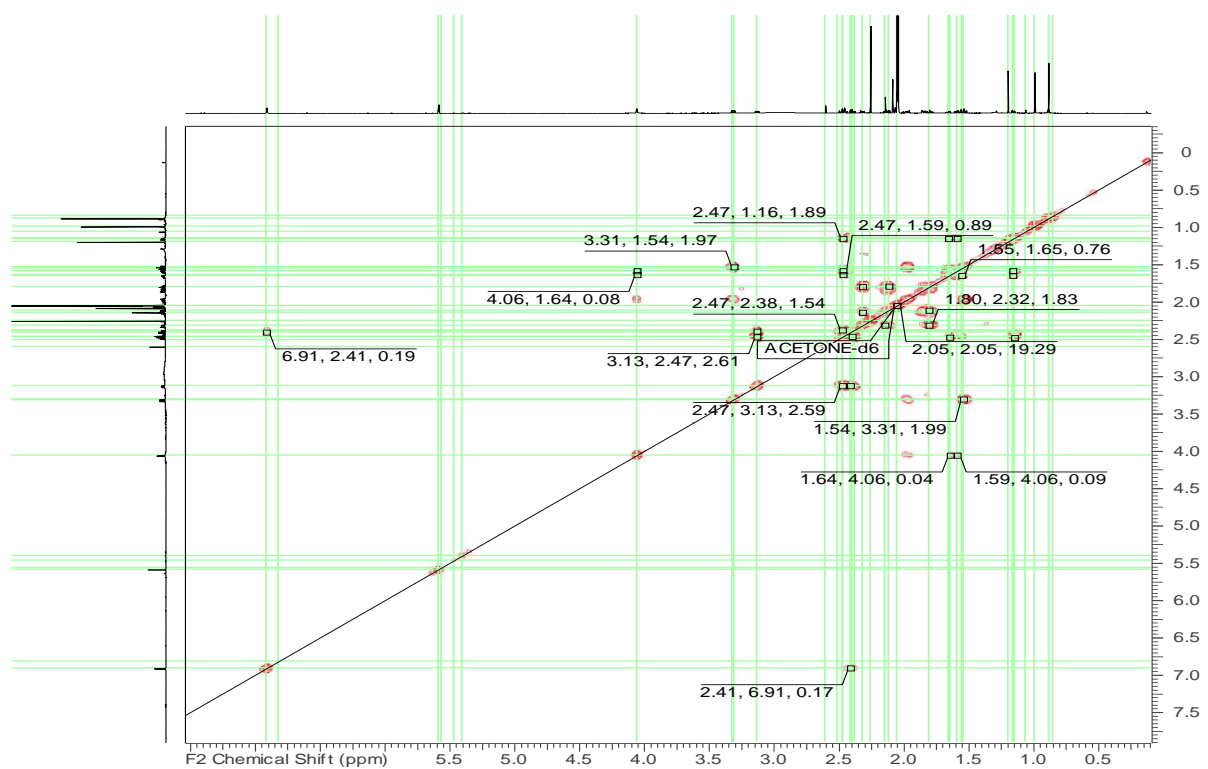



Figure 39:  $^1\text{H}$ ,  $^1\text{H}$  ROESY spectrum of Aethiopinolone D (4) in acetone- $\text{d}_6$  (700 MHz)

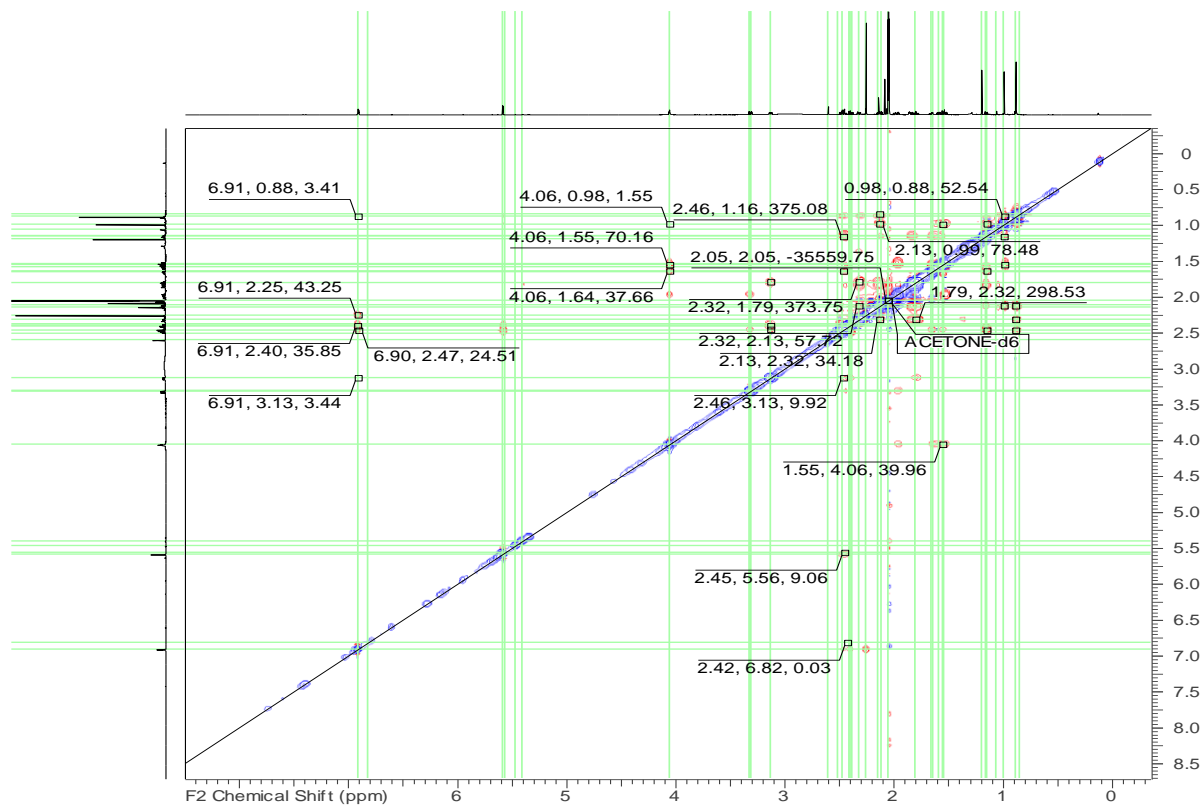

Figure 40: HRMS spectrum for Aethiopinolone D (4)

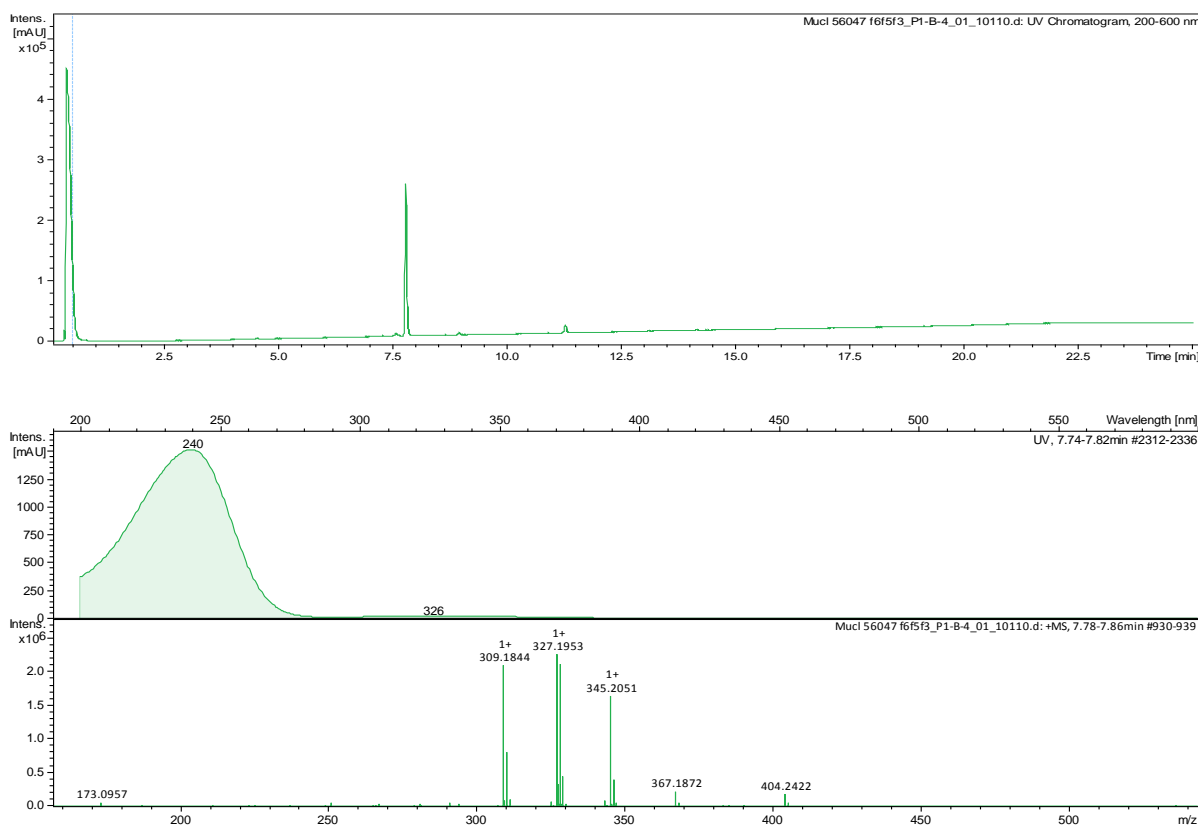

Figure 41:  $^1\text{H}$  NMR spectrum of Aethiopinolone D (4) (S)- MTPA ester in pyridine- $d_5$  (700 MHz)

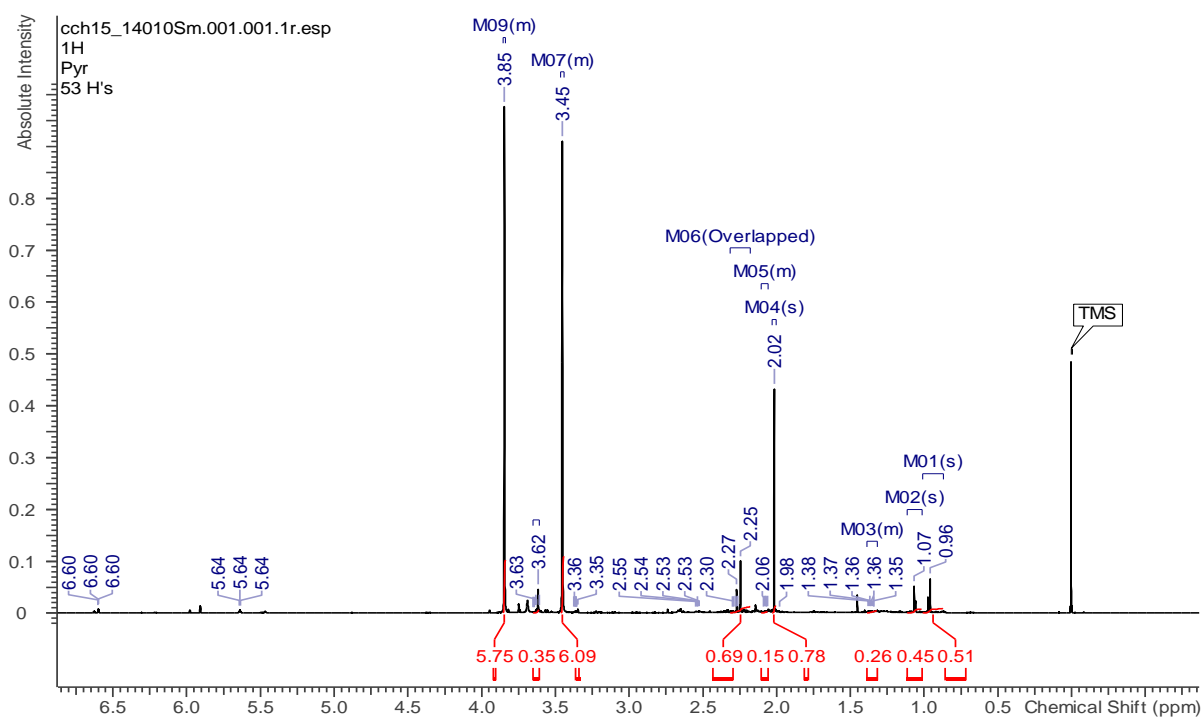

Figure 42:  $^1\text{H}$ ,  $^1\text{H}$  COSY spectrum of Aethiopinolone D (4) (S)- MTPA ester in pyridine- $d_5$  (700 MHz)

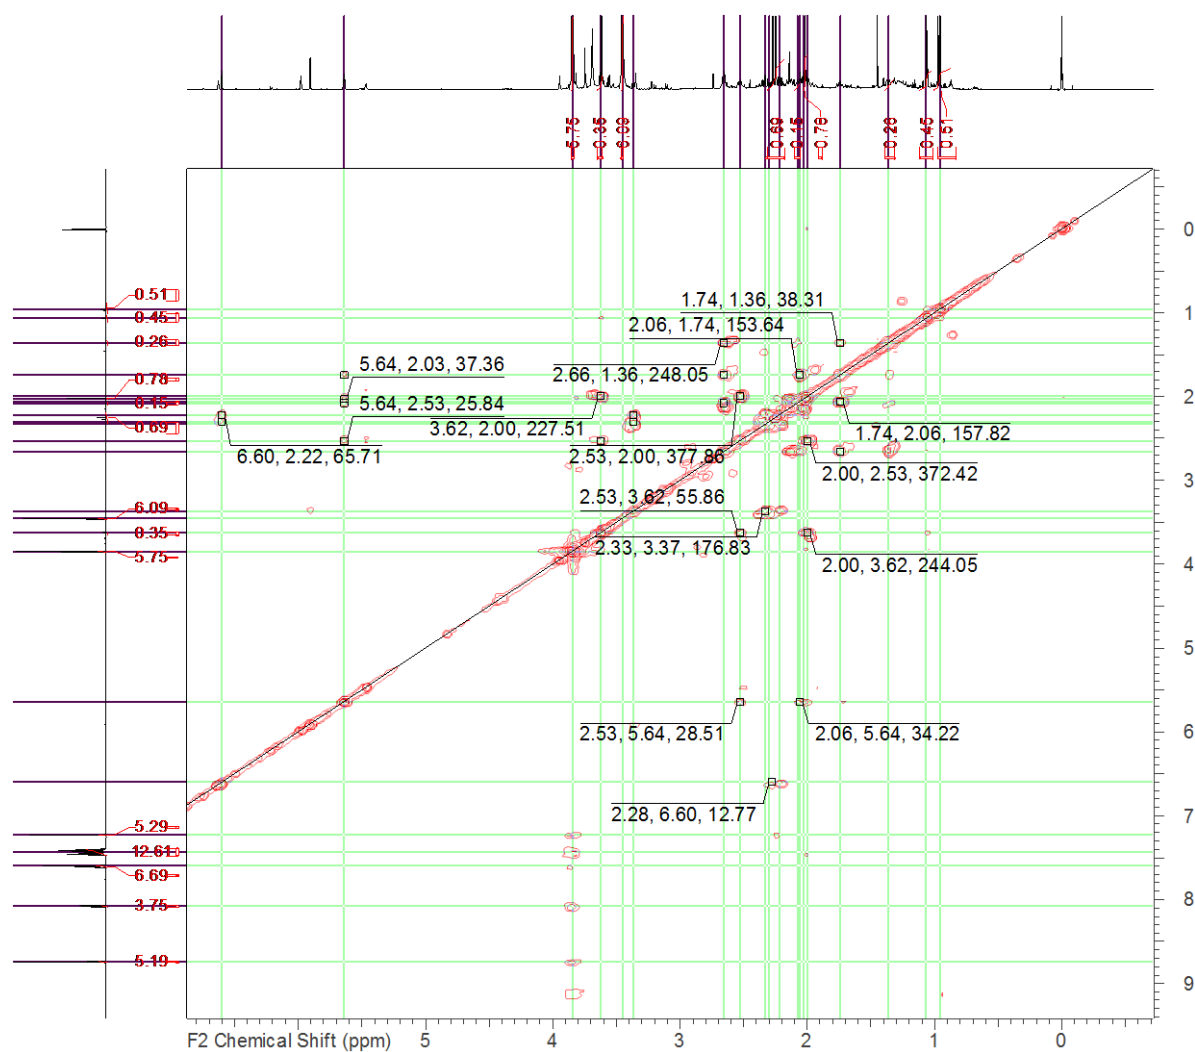

Figure 43: <sup>1</sup>H NMR spectrum of Aethiopinolone D (4) (R)- MTPA ester in pyridine -d<sub>5</sub> (700 MHz)

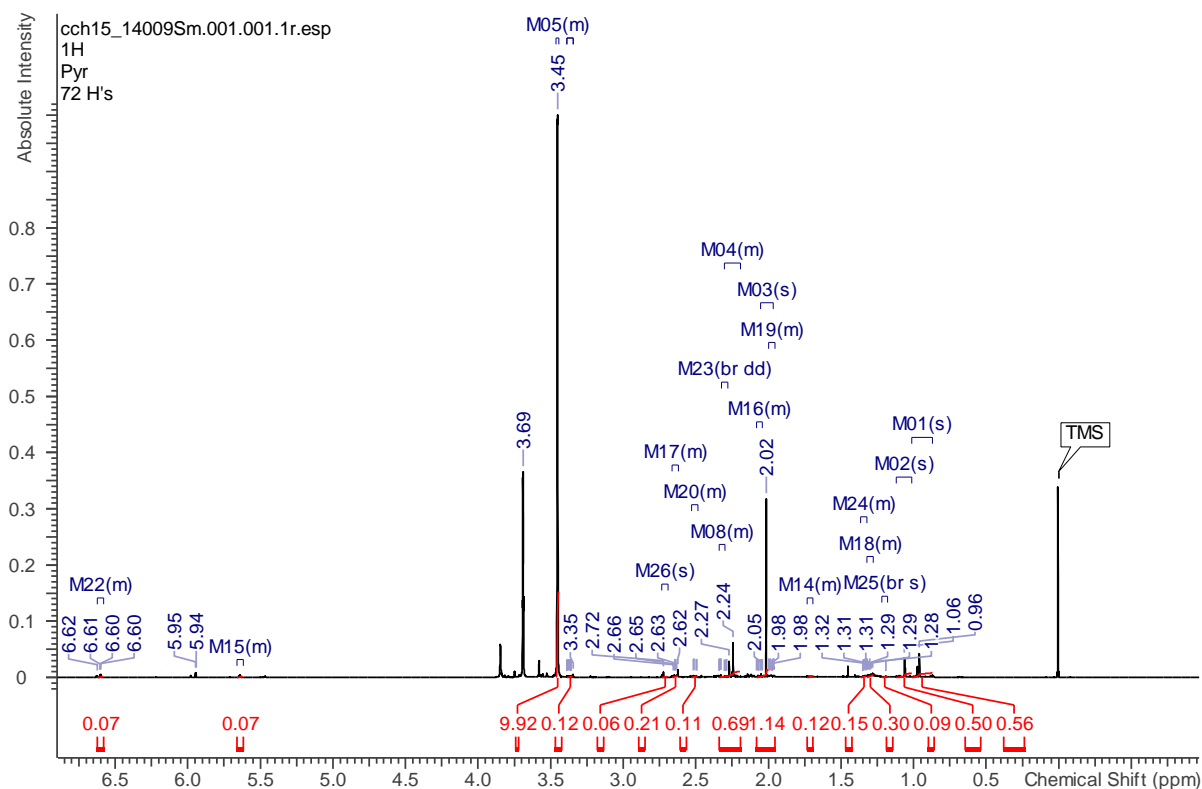

Figure 44: <sup>1</sup>H, <sup>1</sup>H COSY spectrum of Aethiopinolone D (4) (R)- MTPA ester in pyridine -d<sub>5</sub> (700 MHz)

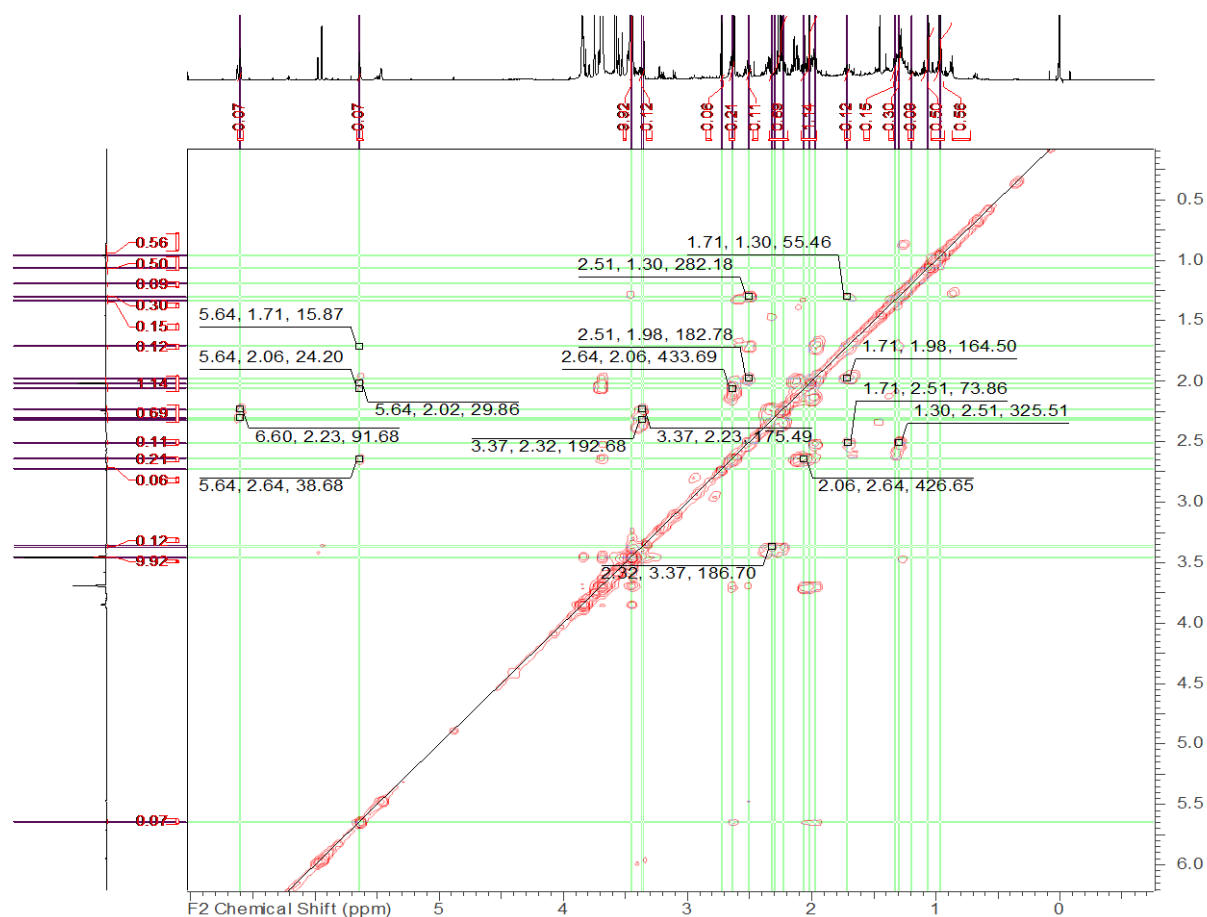

### 1 and 2D NMR data for Aethiopinolone E (5)

Figure 45: <sup>1</sup>H NMR spectrum of Aethiopinolone E (5) in acetone-d<sub>6</sub> (700 MHz)

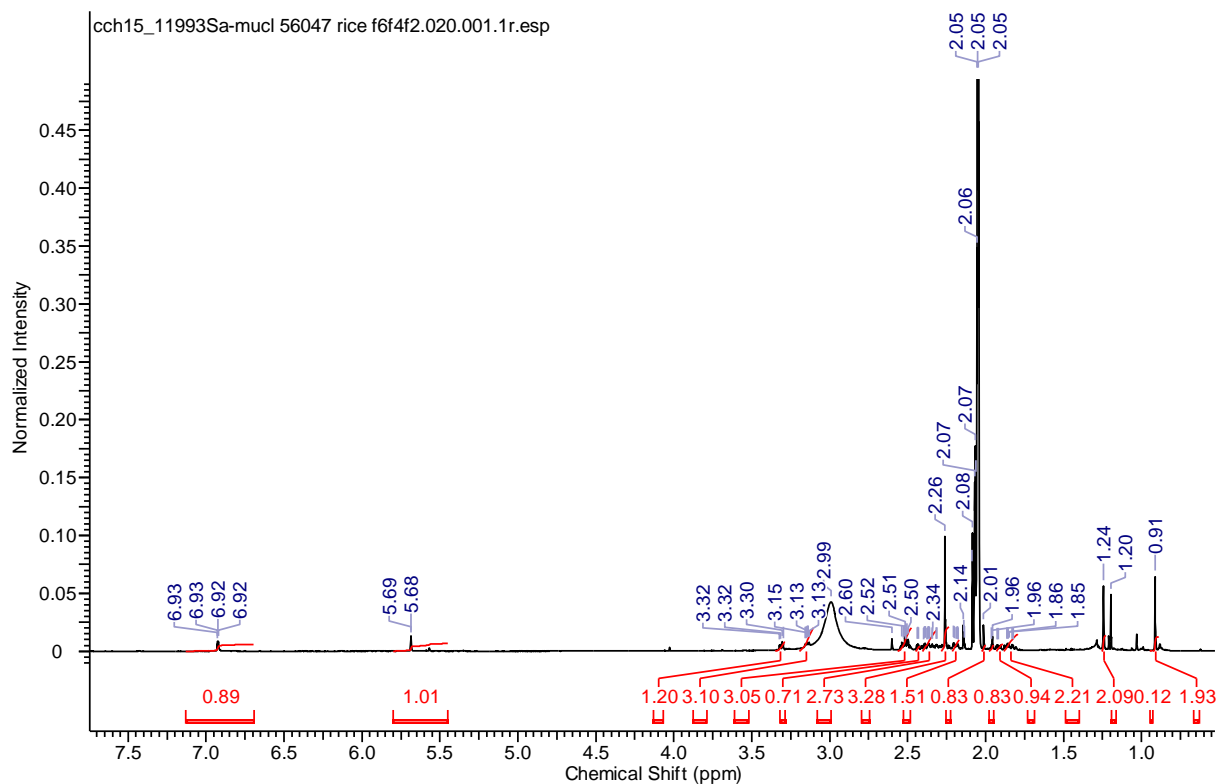

Figure 46: <sup>13</sup>C NMR spectrum of Aethiopinolone E (5) in acetone-d<sub>6</sub> (175 MHz)

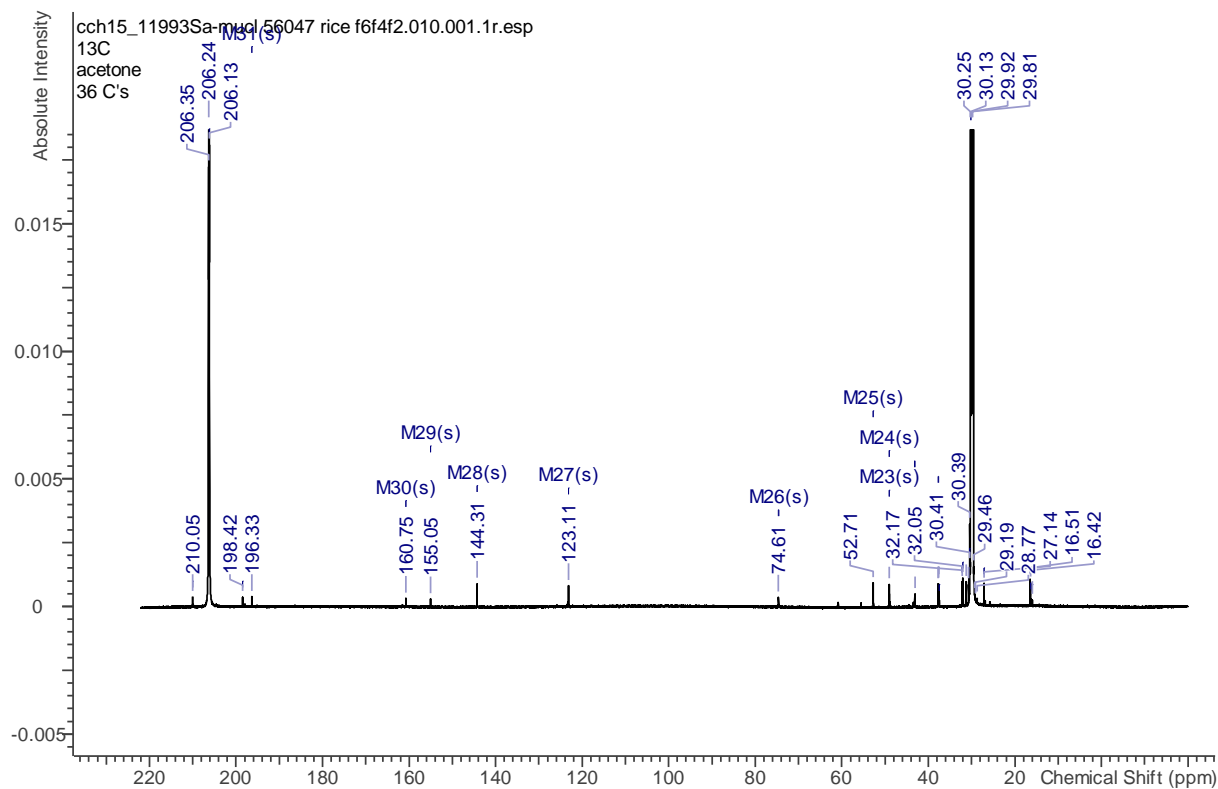

Figure 47: DEPT NMR spectrum of Aethiopinolone E (5) in acetone-d<sub>6</sub> (175 MHz)

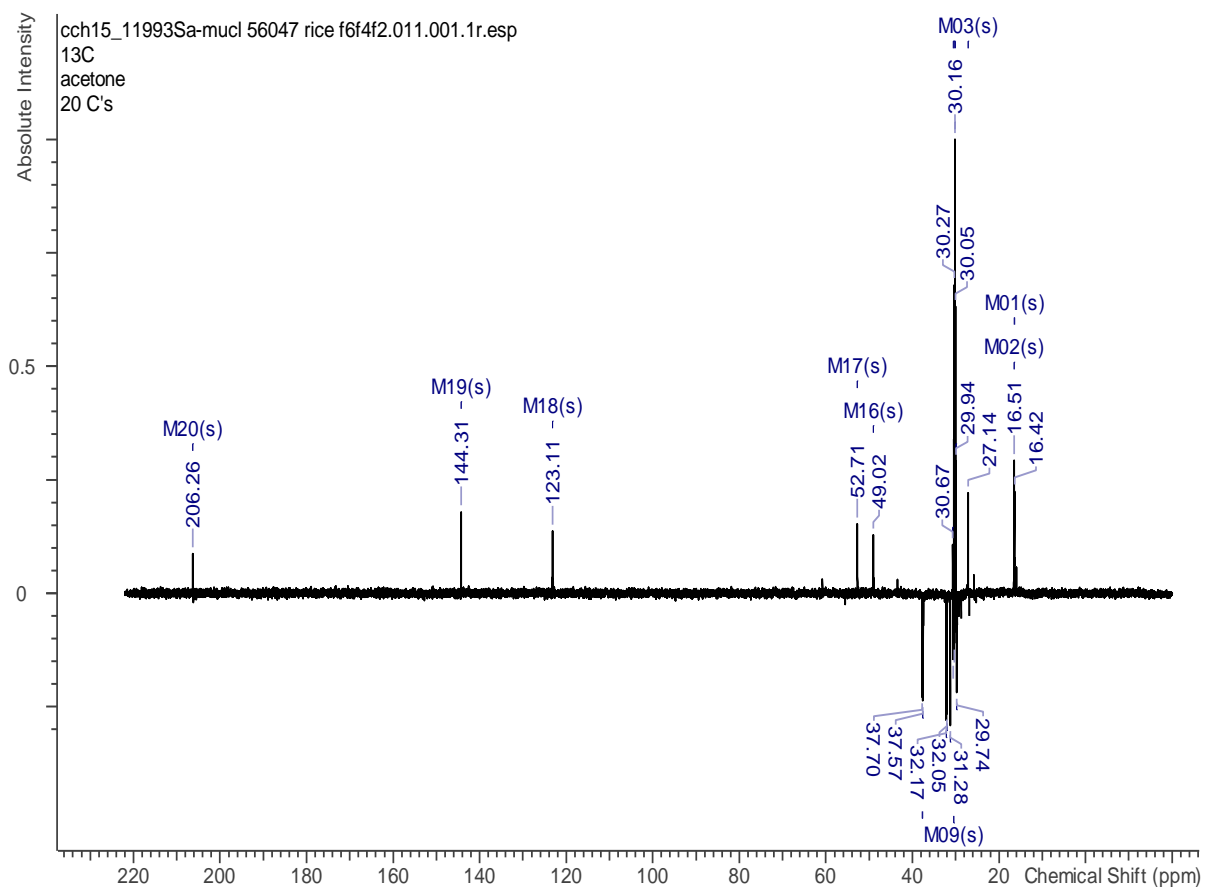

Figure 48: <sup>1</sup>H, <sup>13</sup>C HSQC NMR spectrum of Aethiopinolone E (5) in acetone-d<sub>6</sub> (700 MHz, 175 MHz)

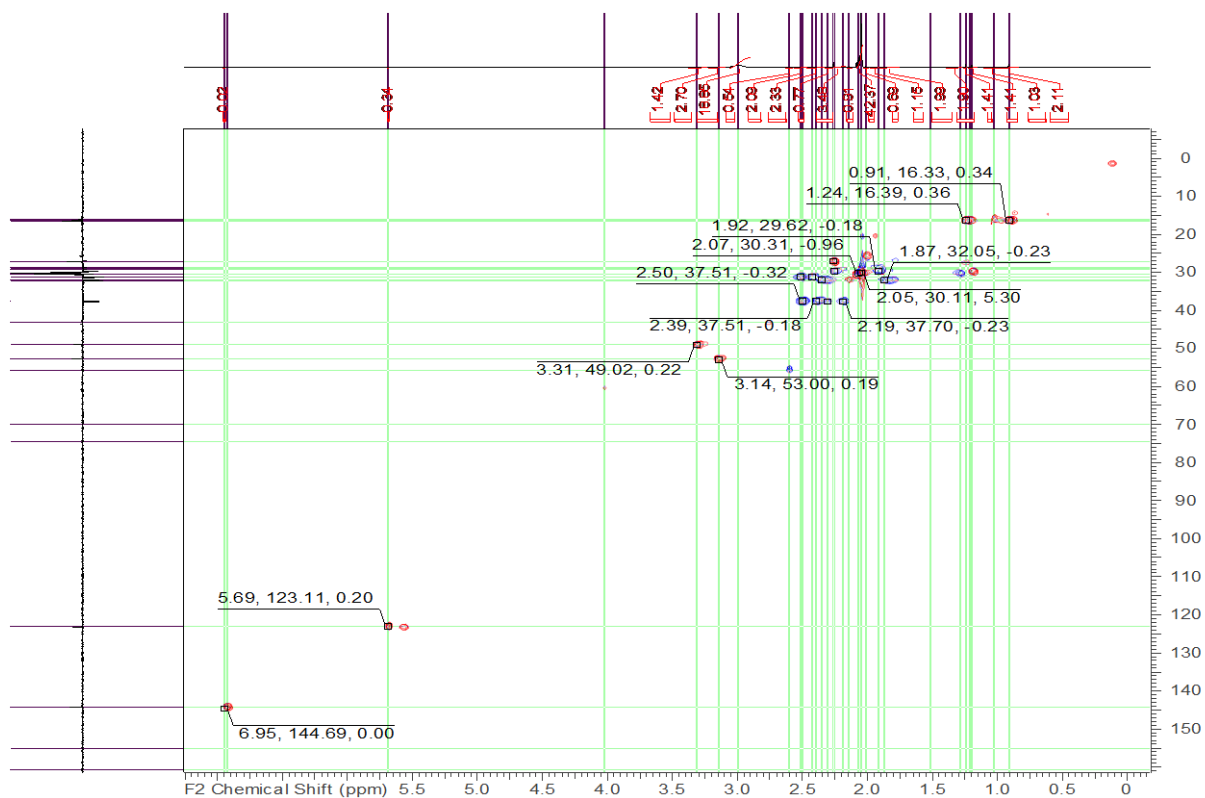

Figure 49:  $^1\text{H}$ ,  $^{13}\text{C}$  HMBC NMR spectrum of Aethiopinolone E (5) in acetone- $d_6$  (700 MHz, 175 MHz)

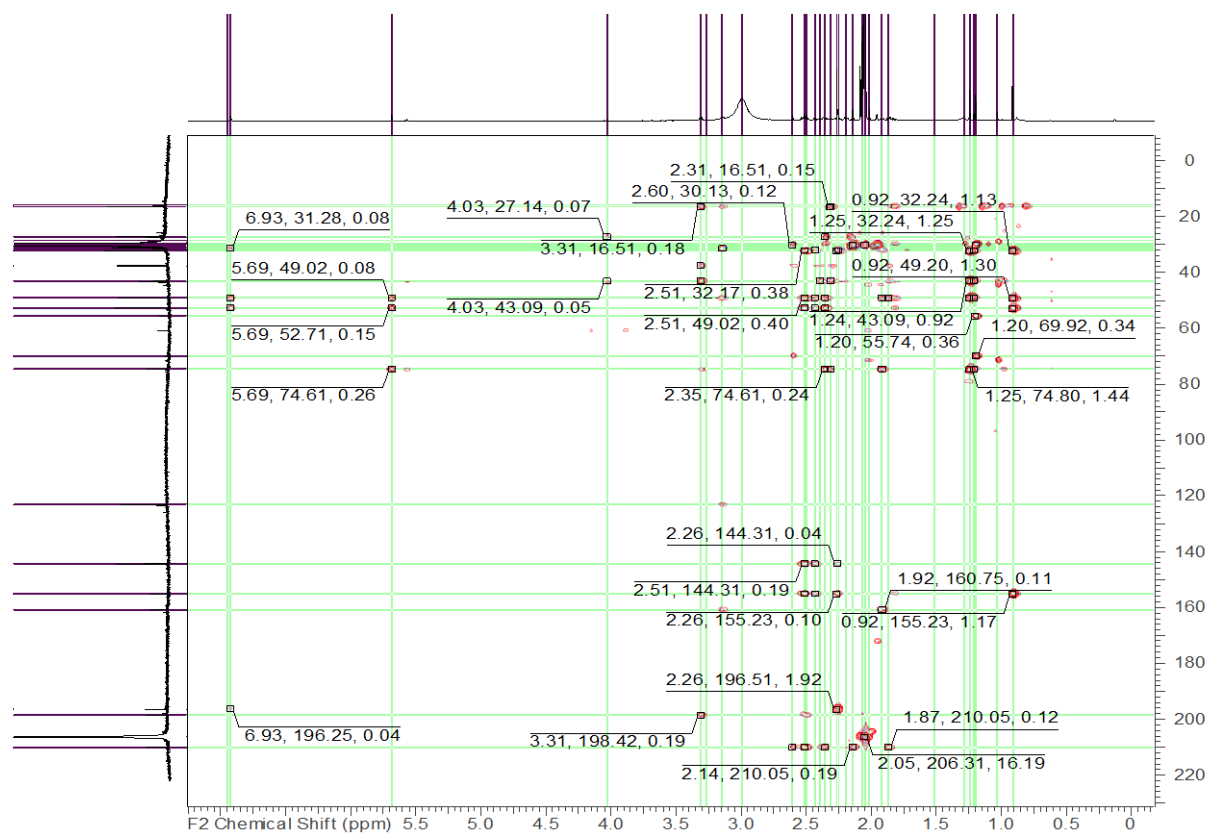

Figure 50:  $^1\text{H}$ ,  $^1\text{H}$  COSY NMR spectrum of Aethiopinolone E (5) in acetone- $d_6$  (700 MHz)

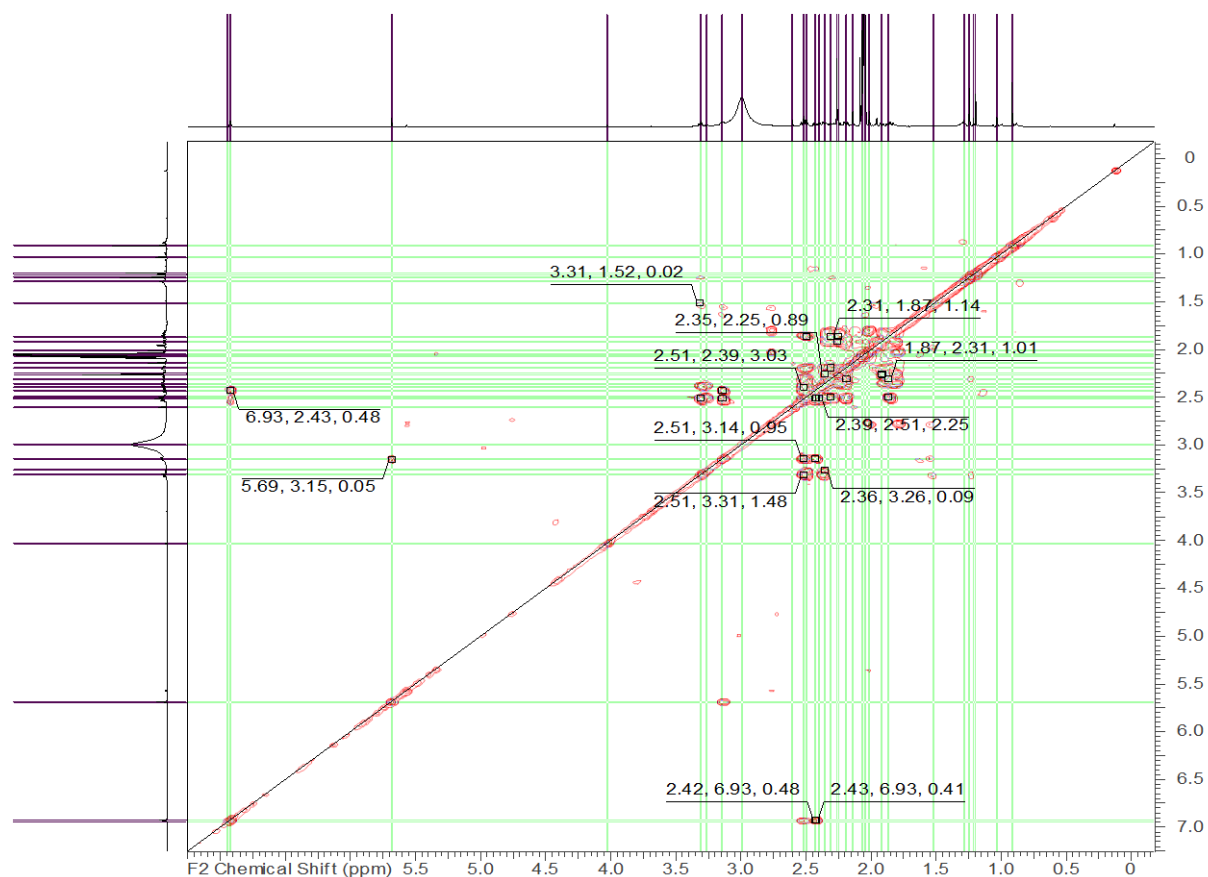

Figure 51:  $^1\text{H}$ ,  $^1\text{H}$  ROESY NMR spectrum of Aethiopinolone E (5) in acetone- $d_6$  (700 MHz)

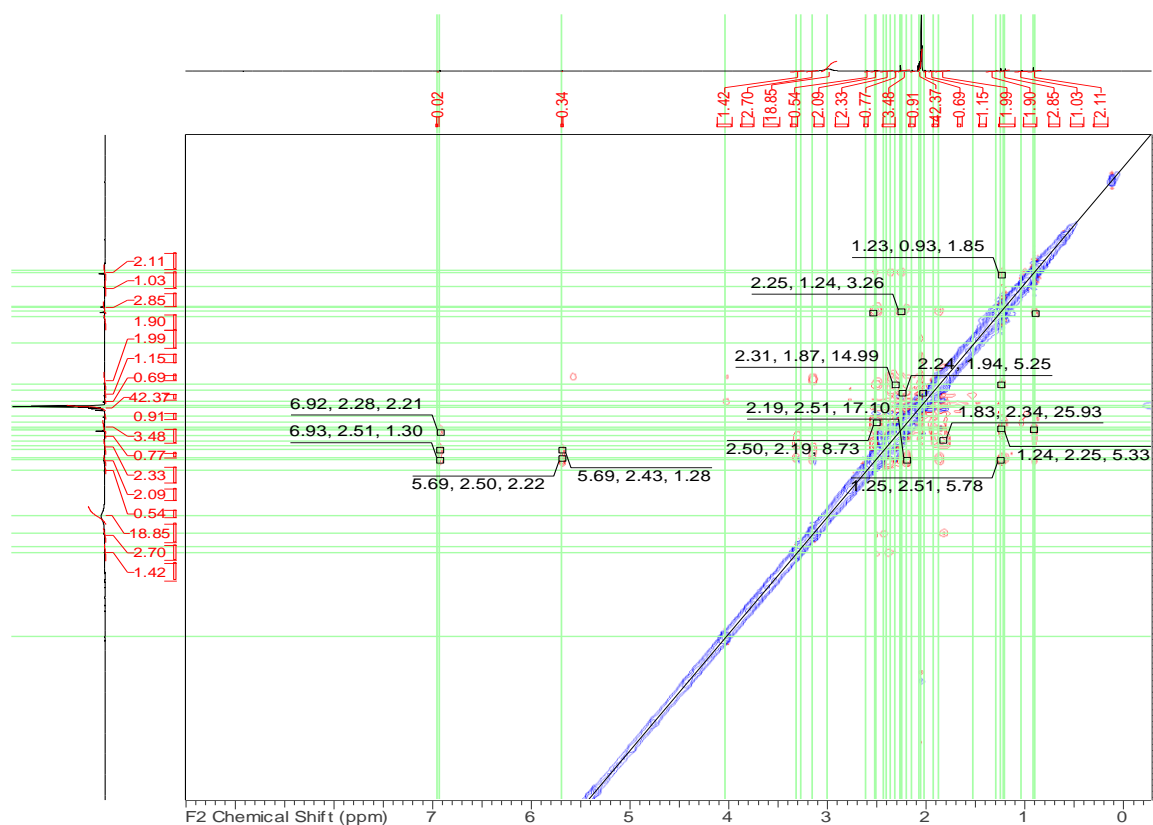

Figure 52: HRMS spectrum for Aethiopinolone E (5)

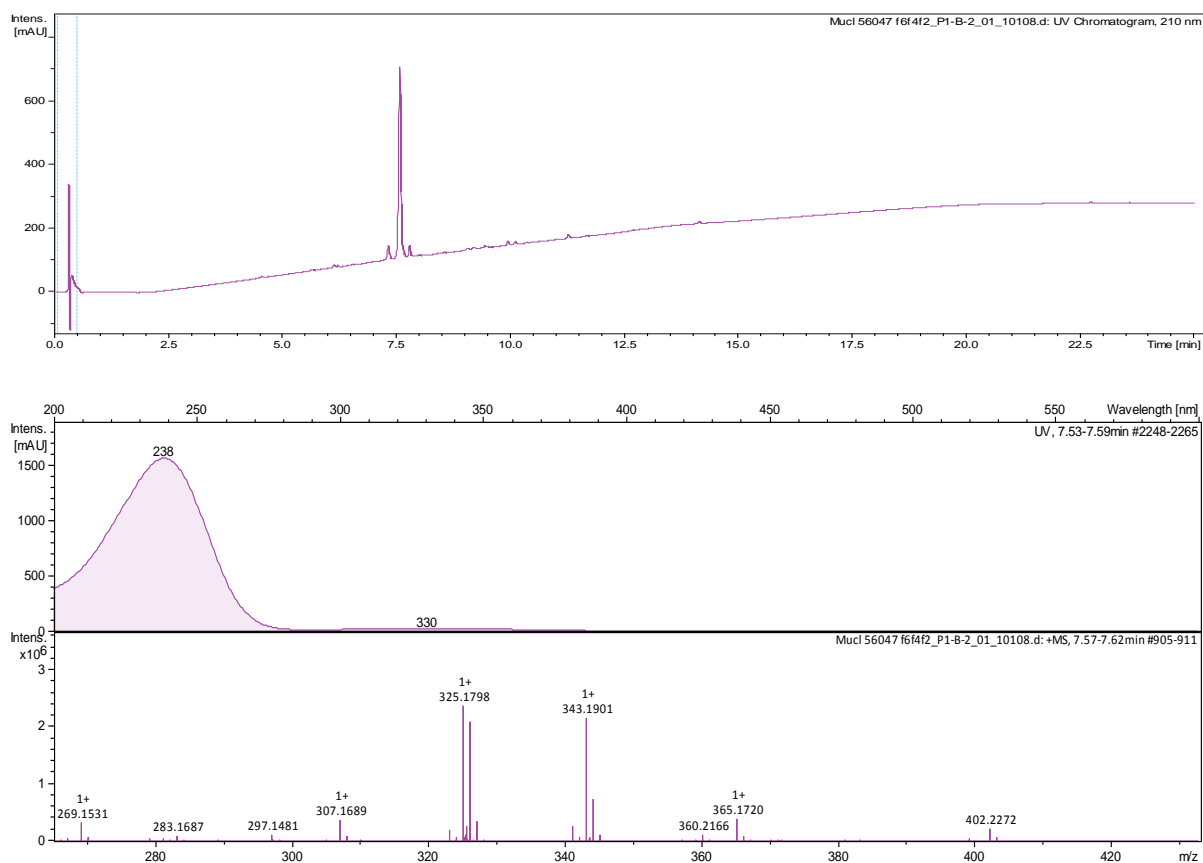

Table 1.

Table 1: S-MTPA ester and R-MTPA ester chemical shifts analysis for Aethiopinolone A (1)

|            | S     | R      | S-R    |
|------------|-------|--------|--------|
| 4 $\alpha$ | 2.388 | 2.309  | +0.079 |
| 4 $\beta$  | 1.631 | 1.590  | +0.041 |
| 5          | 2.985 | 2.970  | +0.015 |
| 7          | 5.766 | 5.757  | +0.009 |
| 14         | 3.040 | 3.038  | +0.002 |
| 17         | 2.470 | 2.468  | +0.002 |
| 3          | 5.016 | 5.012  | +0.004 |
| 2 $\alpha$ | 1.945 | 2.023  | -0.078 |
| 2 $\beta$  | 1.515 | 1.625  | -0.110 |
| 1 $\alpha$ | 2.011 | 2.334  | -0.016 |
| 1 $\beta$  | 1.303 | 1.364  | -0.061 |
| 19         | 1.034 | 1.045  | -0.011 |
| 18         | 0.896 | 0.0897 | -0.001 |

Table 2: S-MTPA ester and R-MTPA ester chemical shifts analysis for Aethiopinolone C (3)

|            | S     | R     | S-R    |
|------------|-------|-------|--------|
| 4 $\beta$  | 1.926 | 1.846 | +0.080 |
| 4 $\alpha$ | 2.711 | 2.669 | +0.042 |
| 5          | 3.528 | 3.506 | +0.022 |
| 3          | 5.290 | 5.287 | +0.003 |
| 2 $\beta$  | 1.556 | 1.685 | -0.129 |
| 2 $\alpha$ | 1.983 | 2.049 | -0.066 |
| 1 $\alpha$ | 2.397 | 2.418 | -0.021 |
| 19         | 1.019 | 1.027 | -0.008 |
| 18         | 0.948 | 0.950 | -0.002 |

Table 3: S-MTPA ester and R-MTPA ester chemical shifts analysis for Aethiopinolone D (4)

|            | S     | R     | S-R    |
|------------|-------|-------|--------|
| 4 $\beta$  | 1.999 | 2.011 | -0.012 |
| 4 $\alpha$ | 2.530 | 2.640 | -0.11  |
| 5          | 3.619 | 3.715 | -0.096 |
| 3          | 5.639 | 5.640 | -0.001 |
| 2 $\beta$  | 2.078 | 1.976 | +0.102 |
| 2 $\alpha$ | 1.741 | 1.713 | +0.028 |
| 1 $\alpha$ | 2.657 | 2.507 | +0.15  |
| 1 $\beta$  | 1.361 | 1.298 | +0.063 |
| 19         | 1.067 | 1.062 | +0.005 |
| 18         | 0.971 | 0.959 | +0.012 |



**ITS sequences of the producing organism**

```
TTGAGGCAAGGGTCAAAAATGGTTTAAGGTAACAGAGTACCTGTCTGACACATAGGCAGACT  
ATTGGAAGCAGACAGTCTAAGTAAGCACTGGTGAATATAGATAGAAAATATTACACCAAAC  
AATGCGAACTACAGTCCAGCTAATGCATTTGAGAGGAGCCGATACAGACAGTACCAGCATA  
ATATTGCCTCCAAGTCCAAGCCCCTTCTTCAATTAAGAAAAAGAGGATTGAGAATTACATGAC  
ACTCAAACAGGCATGCCCTCGGAATACCAAGGGGCGCAAGGTGCGTTCAAAGATTGATGA  
TTCAGTGAATTCTGCAATTCACATTACTTATCGCATTTGCTGCGTTCTTCATCGATGCGAGAG  
CCAAGAGATCCGTTGTTGAAAGTTGTATATTTGTATTTGCTCACAGGAGCATTACACATTCAC  
AGGAACAAGAAAATGTTTGTATAGGTAAGTCAAAGTGTTTCATAGTAAGTAAAGCCAAGAT  
CATTACTACTGCCAGAAGGGGTACCC
```

**Pictures of the herbarium and the culture of *Fomitiporia aethiopica***

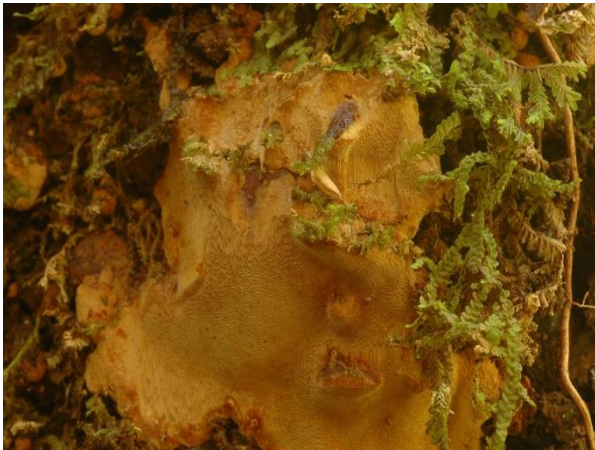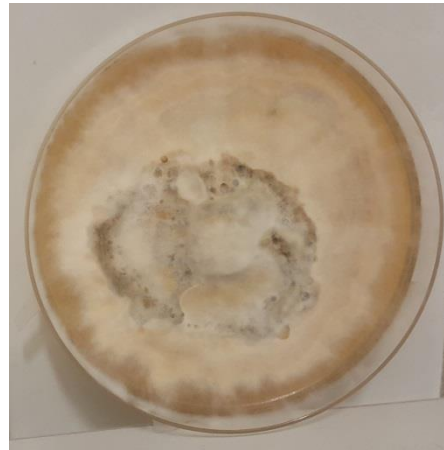

Supplement: molecules-23-00369-s001.pdf [file molecules-23-00369-s001.pdf]
